# Supplementary material
Source: publisher figshare collection journal article supplement (https://tandf.figshare.com/articles/dataset/_/22884302)
Supplement: Supplementary file 1 [file 40617908]

**Investigation of the mechanism of action of chemical constituents of celery seed against  
gout disease using network pharmacology, molecular docking and molecular dynamics  
simulations**

Nguyen Thu Hang<sup>1</sup>, Do Khai Han<sup>1</sup>, Than Thi Kieu My<sup>1</sup>, Nguyen Van Phuong<sup>1\*</sup>

<sup>1</sup>Department of Pharmacognosy, Faculty of Pharmacognosy and Traditional Medicine, Hanoi  
University of Pharmacy, Hanoi, Vietnam

\*Corresponding author: Nguyen Van Phuong

Email: [phuongnv@hup.edu.vn](mailto:phuongnv@hup.edu.vn)

ORCID: <https://orcid.org/0000-0002-1915-0565>

**Table S1.** 155 chemical constituents of celery seed

**Table S2.** 1551 genes related to gout

**Table S3.** 779 targets of celery seed

**Table S4.** Molecular interaction between the potent compounds of celery seed and core targets of gout disease

**Figure S1.** Interaction between C1 and HSP90 $\alpha$  (a), MAPK14-C1 (b) after molecular dynamics simulations. The interacted residues of HSP90 $\alpha$  were identified as Phe22, Gln23, Ile26, Met98, Leu103, Leu107, Gly108, Phe138, Tyr139, Trp162, and Phe170. The interacted residues of MAPK14 were identified as Tyr35, Val38, Ala51, Lys53, Leu108, Met109, Ala157, Leu167, and Phe169.

**Table S1.** 155 chemical constituents of celery seed

| No. | Compound                                      | Structure                                                                                                                                                                                                                                                                                                                                                                    | F(30%) |
|-----|-----------------------------------------------|------------------------------------------------------------------------------------------------------------------------------------------------------------------------------------------------------------------------------------------------------------------------------------------------------------------------------------------------------------------------------|--------|
| 1   | (2R,3S)-2-Hydroxy-3-isopropylbutanedioic acid | 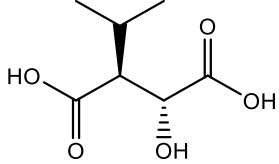 <p>The structure shows a four-carbon chain with two carboxylic acid groups at the ends. The second carbon has a hydroxyl group (OH) attached with a wedge bond, and the third carbon has an isopropyl group attached with a wedge bond.</p>                                               | 0.982  |
| 2   | (S)-5'-deoxy-5'-(methylsulfinyl)adenosin      |  <p>The structure consists of an adenine base attached to a ribose sugar ring. The sugar has hydroxyl groups at the 2' and 3' positions and a methylsulfinyl group (-S(=O)CH<sub>3</sub>) at the 5' position. The adenine base has an amino group (-NH<sub>2</sub>) at the 6-position.</p> | 0.199  |
| 3   | 1,6-Dimethoxyppyren                           |  <p>The structure is a pyrene molecule with two methoxy groups (-OCH<sub>3</sub>) attached at the 1 and 6 positions.</p>                                                                                                                                                                  | 0.783  |
| 4   | 1-Hexadecanol                                 |  <p>The structure is a long-chain alcohol with a hydroxyl group (-OH) at the end of a 16-carbon alkyl chain.</p>                                                                                                                                                                         | 0.992  |
| 5   | 1H-indol-3-carboxaldehyd                      |  <p>The structure is an indole ring system with an aldehyde group (-CHO) attached at the 3-position.</p>                                                                                                                                                                                 | 0.967  |
| 6   | 1-naphthylmethanol                            |  <p>The structure is a naphthalene ring system with a hydroxymethyl group (-CH<sub>2</sub>OH) attached at the 1-position.</p>                                                                                                                                                            | 0.142  |
| 7   | 2,4-Diethylthiazol                            |  <p>The structure is a five-membered thiazole ring with ethyl groups (-CH<sub>2</sub>CH<sub>3</sub>) attached at the 2 and 4 positions.</p>                                                                                                                                              | 0.674  |

| No. | Compound                               | Structure                                                                            | F(30%) |
|-----|----------------------------------------|--------------------------------------------------------------------------------------|--------|
| 8   | 2,5-Dioxopentanoat                     | 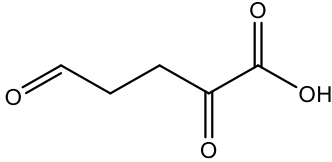   | 0.222  |
| 9   | 2,6-Piperidinedicarboxylic acid        |    | 0.066  |
| 10  | 2-Acetyl-1-ethylpyrrol                 |    | 0.003  |
| 11  | 2-Butyl-1-octanol                      |    | 0.918  |
| 12  | 2-Butyl-3-phenyl-2-propen-1-al         |   | 0.018  |
| 13  | 2-Hydroxy-8-methylchromen-2-carboxylat |  | 0.001  |
| 14  | 2-Hydroxyethanesulfonat                |  | 0.986  |
| 15  | 2-Hydroxymuconat semialdehyd           |  | 0.057  |
| 16  | 2-Ketobutyric acid                     |  | 0.057  |

| No. | Compound                                      | Structure                                                                            | F(30%) |
|-----|-----------------------------------------------|--------------------------------------------------------------------------------------|--------|
| 17  | 2-Naphthol                                    | 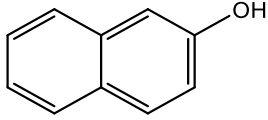   | 0.803  |
| 18  | 2-Phenylacetamid                              |    | 0.013  |
| 19  | 2-Pyrocatechuic acid                          |    | 0.973  |
| 20  | 3-(4-methoxy-6-oxopyran-2-yl)butanoic acid    |    | 0.938  |
| 21  | 3,3,5-Triiodo-L-thyronine-beta-D-glucuronosid |   | 0.001  |
| 22  | 3'-Deoxyadenosin                              |  | 0.099  |
| 23  | 3'-Methoxy-E,E-dienoestrol                    |  | 0.084  |
| 24  | 3-Aminobenzamid                               |  | 0.988  |

| No. | Compound                                    | Structure                                                                            | F(30%) |
|-----|---------------------------------------------|--------------------------------------------------------------------------------------|--------|
| 25  | 3-Buten-2-on 1-(2,3,6-trimethyl phenyl)     | 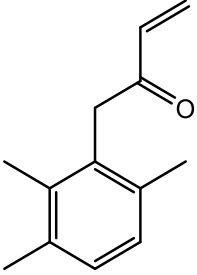   | 0.002  |
| 26  | 3-Carboxypropyl trimethylammonium           |    | 0.98   |
| 27  | 3-Hydroxypropionic acid                     |    | 0.985  |
| 28  | 3-Methyl-1-phenyl-3-pentanol                |    | 0.003  |
| 29  | 3-Methylbenzaldehyd                         |   | 0.003  |
| 30  | 4-Guanidinobutanoic acid                    |  | 0.842  |
| 31  | 4-Hydroxydihydrocinnamaldehyd               |  | 0.016  |
| 32  | 4-Hydroxymethyl-3-methoxyphenoxyacetic acid |  | 0.208  |
| 33  | 4-Methyl-1-phenyl-2-pentanon                |  | 0.001  |

| No. | Compound                      | Structure                                                                            | F(30%) |
|-----|-------------------------------|--------------------------------------------------------------------------------------|--------|
| 34  | 4-Methyl-N-ethylcathinon      | 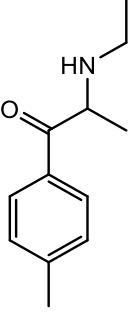   | 0.065  |
| 35  | 4-Pyridoxic acid              |    | 0.015  |
| 36  | 5,6,7,8-Tetrahydro-2-naphthol |    | 0.995  |
| 37  | 6-Hydroxy caproic acid dimer  |    | 0.01   |
| 38  | 6-Hydroxyangelicin            |   | 0.995  |
| 39  | 6-Hydroxynicotinic acid       |  | 0.919  |
| 40  | Adenin                        |  | 0.379  |
| 41  | Adenosin                      |  | 0.64   |

| No. | Compound                             | Structure                                                                            | F(30%) |
|-----|--------------------------------------|--------------------------------------------------------------------------------------|--------|
| 42  | Aesculetin                           | 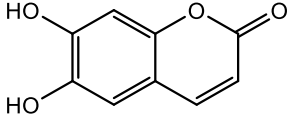   | 1      |
| 43  | Aesculin                             |    | 0.998  |
| 44  | Apigenin                             |    | 0.999  |
| 45  | Apiin                                |   | 0.999  |
| 46  | Beta-carboline                       |  | 0.399  |
| 47  | Butylphthalid<br>(3-n-Butylphthalid) |  | 0.582  |

| No. | Compound                                       | Structure                                                                            | F(30%) |
|-----|------------------------------------------------|--------------------------------------------------------------------------------------|--------|
| 48  | Chalconaringenin                               | 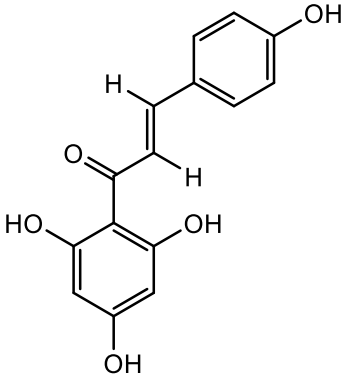   | 0.609  |
| 49  | Cholestan-3beta-ol                             |    | 0.732  |
| 50  | Cholestane-3,5,6-triol, (3beta, 5alpha,6beta)- |   | 0.614  |
| 51  | Cicaprost                                      |  | 0.014  |
| 52  | Coniferyl alcohol                              |  | 0.742  |



| No. | Compound                                    | Structure                                                                            | F(30%) |
|-----|---------------------------------------------|--------------------------------------------------------------------------------------|--------|
| 53  | Cordycepin                                  | 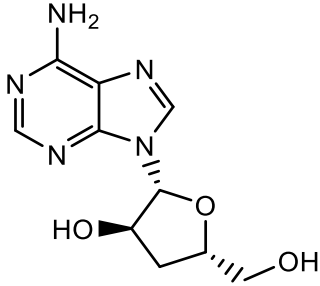   | 0.099  |
| 54  | Cytarabine                                  |    | 0.921  |
| 55  | (S)-3-Aminodecanoic Acid                    |    | 0.127  |
| 56  | Diflufenican                                |   | 0.004  |
| 57  | Dihydroxy-7-methoxy-2,3-dihydrochromen-4-on |  | 0.06   |
| 58  | DL-anabasin                                 |  | 0.564  |
| 59  | Dopamin                                     |  | 0.971  |

| No. | Compound        | Structure                                                                            | F(30%) |
|-----|-----------------|--------------------------------------------------------------------------------------|--------|
| 60  | Ectoin          | 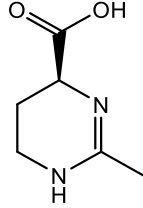   | 0.003  |
| 61  | Ensulizol       |    | 0.106  |
| 62  | Erucamid        |    | 0.97   |
| 63  | Eugenitol       |    | 0.838  |
| 64  | Farnesal        |    | 0.685  |
| 65  | Farnesol        |  | 0.995  |
| 66  | Flavan skeleton |  | 0.891  |
| 67  | Foliosidin      |  | 0.094  |
| 68  | Genipic acid    |  | 0.646  |

| No. | Compound              | Structure                                                                            | F(30%) |
|-----|-----------------------|--------------------------------------------------------------------------------------|--------|
| 69  | Gentisic acid         | 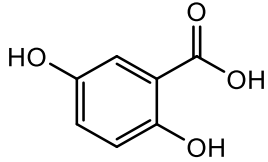   | 0.988  |
| 70  | Glycyl-glutamin       |    | 0.047  |
| 71  | Glycin                |    | 0.001  |
| 72  | Glycolic acid         |    | 0.007  |
| 73  | Heptyl format         |    | 0.826  |
| 74  | Imidacloprid-guanidin |   | 0.004  |
| 75  | Imidazoleacetic acid  |  | 0.004  |
| 76  | Indoleacetic acid     |  | 0.008  |
| 77  | Indoleacrylic acid    |  | 0.146  |
| 78  | Inosin                |  | 0.266  |
| 79  | Lauric acid           |  | 0.979  |

| No. | Compound                           | Structure                                                                            | F(30%) |
|-----|------------------------------------|--------------------------------------------------------------------------------------|--------|
| 80  | Linoleic acid                      | 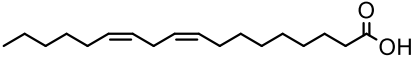   | 0.549  |
| 81  | L-tryptophan                       |    | 0.001  |
| 82  | Luteolin 7-galactosid              |    | 0.999  |
| 83  | Mannitol                           |    | 0.992  |
| 84  | Mequinol                           |   | 0.277  |
| 85  | Mesylat                            |  | 0.043  |
| 86  | Methiocarb-sulfoxid                |  | 0.055  |
| 87  | Methyl 3-methyl-1-butenyl disulfid |  | 0.806  |
| 88  | Methyl jasmonat                    |  | 0.153  |

| No. | Compound                              | Structure                                                                            | F(30%) |
|-----|---------------------------------------|--------------------------------------------------------------------------------------|--------|
| 89  | Myo-inositol                          | 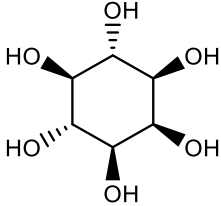   | 0.999  |
| 90  | Myristic acid                         |    | 0.987  |
| 91  | N-(2-hydroxyethyl)-iminodiacetic acid |    | 0.991  |
| 92  | N-acetylhistamin                      |    | 0.35   |
| 93  | N-Acetylhomoprolin                    |   | 0.004  |
| 94  | N-acetylisatin                        |  | 0.114  |
| 95  | Nipecotic acid                        |  | 0.087  |
| 96  | Oleic acid                            |  | 0.658  |

| No. | Compound                        | Structure                                                                            | F(30%) |
|-----|---------------------------------|--------------------------------------------------------------------------------------|--------|
| 97  | Ormetoprim                      | 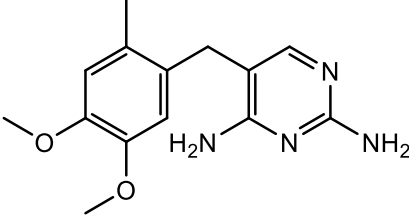   | 0.006  |
| 98  | Oxoprolin                       |    | 0.971  |
| 99  | Palmitic acid                   |    | 0.991  |
| 100 | Patulin                         |    | 0.705  |
| 101 | Pelargonidin 3-O-glucosid       |   | 0.996  |
| 102 | Peonidin 3-(6''-acetylglucosid) |  | 0.982  |

| No. | Compound                           | Structure                                                                                                                                                                                                                                                                                                                                                                                                                                                      | F(30%) |
|-----|------------------------------------|----------------------------------------------------------------------------------------------------------------------------------------------------------------------------------------------------------------------------------------------------------------------------------------------------------------------------------------------------------------------------------------------------------------------------------------------------------------|--------|
| 103 | Peonidin-3-O-beta galactopyranosid | 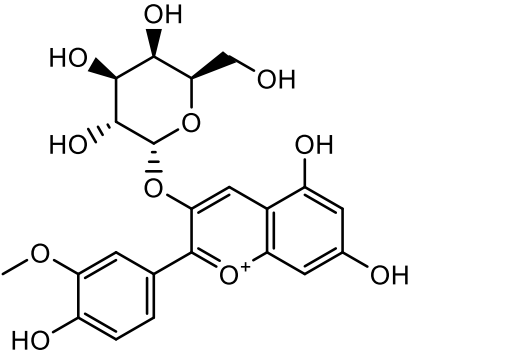 <p>The structure shows a beta-D-galactopyranoside ring attached to the 3-position of a peonidin cation. The peonidin core consists of a chromone ring system with a methoxy group at position 6, hydroxyl groups at positions 5 and 7, and a hydroxyl group at position 8. The galactose ring is in its pyranose form with hydroxyl groups at positions 2, 3, 4, and 6.</p> | 0.993  |
| 104 | Perillyl acetat                    |  <p>The structure shows a cyclohexene ring with an acetate group (-O-C(=O)-CH<sub>3</sub>) attached to the allylic position (C1) and an isopropenyl group (-C(CH<sub>3</sub>)=CH<sub>2</sub>) attached to the ring (C4).</p>                                                                                                                                                 | 0.816  |
| 105 | Phthalic acid                      |  <p>The structure shows a benzene ring with two carboxylic acid groups (-COOH) attached to adjacent carbons (ortho position).</p>                                                                                                                                                                                                                                           | 0.897  |
| 106 | Pregabalin                         |  <p>The structure shows a cyclohexane ring with a carboxylic acid group (-COOH) and an isopropylamino group (-NH-CH<sub>2</sub>-CH<sub>2</sub>-CH(CH<sub>3</sub>)<sub>2</sub>) attached to adjacent carbons.</p>                                                                                                                                                           | 0      |
| 107 | Ribitol                            |  <p>The structure shows a five-carbon polyhydroxy alcohol chain with hydroxyl groups at positions 2, 3, and 4. The hydroxyl groups at positions 2 and 4 are on wedges, and the hydroxyl group at position 3 is on a dash.</p>                                                                                                                                              | 0.991  |
| 108 | S-carboxymethylcystein             |  <p>The structure shows a cysteine derivative with a carboxymethyl group (-CH<sub>2</sub>-COOH) attached to the sulfur atom and an amino group (-NH<sub>2</sub>) attached to the alpha carbon.</p>                                                                                                                                                                         | 0.001  |
| 109 | Selfotel                           |  <p>The structure shows a piperidine ring with a phosphate group (-P(=O)(OH)<sub>2</sub>) attached to the 2-position and a carboxylic acid group (-COOH) attached to the 4-position.</p>                                                                                                                                                                                   | 0.992  |

| No. | Compound                                                 | Structure                                                                            | F(30%) |
|-----|----------------------------------------------------------|--------------------------------------------------------------------------------------|--------|
| 110 | Seryl-Valyl-Glycin                                       | 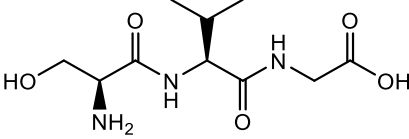   | 0.232  |
| 111 | Stearic acid                                             |    | 0.994  |
| 112 | Terephthalic acid                                        |    | 0.259  |
| 113 | <i>Trans</i> -O-hydroxybenzylidenepyruvat                |    | 0.022  |
| 114 | Vanillin                                                 |   | 0.216  |
| 115 | $\alpha$ -[1-(ethylamino)ethyl]-p-hydroxy-benzyl alcohol |  | 0.009  |
| 116 | $\alpha$ -Terpinen                                       |  | 0.103  |
| 117 | $\Delta$ 6,7- octadecanoic acid                          |  | 0.963  |
| 118 | $\Delta$ 7,8-octadecanoic acid                           |  | 0.963  |
| 119 | 8-hydroxyl-5-methoxypsoralen                             |  | 0.392  |



| No. | Compound                  | Structure                                                                            | F(30%) |
|-----|---------------------------|--------------------------------------------------------------------------------------|--------|
| 120 | Apigravin                 | 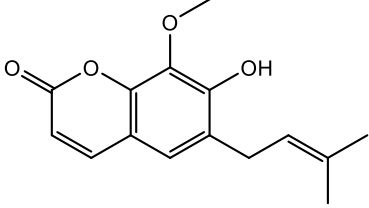   | 0.495  |
| 121 | Apiumetin                 |    | 0.042  |
| 122 | Bergapten                 |    | 0.989  |
| 123 | Caffeic acid              |   | 0.454  |
| 124 | Chlorogenic acid          |  | 0.996  |
| 125 | <i>Cis</i> -limonen oxide |  | 0.007  |
| 126 | D-carvon                  |  | 0.003  |

| No. | Compound                                             | Structure                                                                            | F(30%) |
|-----|------------------------------------------------------|--------------------------------------------------------------------------------------|--------|
| 127 | Graveobioside A (luteolin - 7 - apiosylglucoside)    | 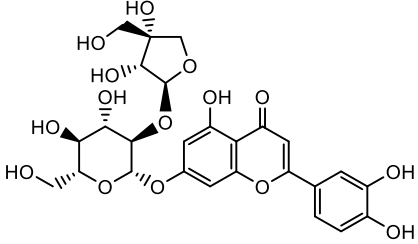   | 1      |
| 128 | Graveobioside B (chrysoeriol - 7 - apiosylglucoside) |    | 0.999  |
| 129 | Isoimperatorin                                       |   | 0.988  |
| 130 | Isopimpinellin                                       |  | 0.012  |
| 131 | Limonen                                              |  | 0.798  |
| 132 | N-amylobenzen                                        |  | 0.935  |
| 133 | Nerolidol                                            |  | 0.829  |

| No. | Compound            | Structure                                                                            | F(30%) |
|-----|---------------------|--------------------------------------------------------------------------------------|--------|
| 134 | Osthenol            | 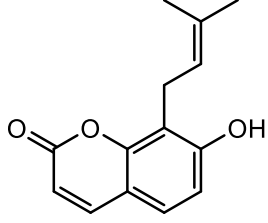   | 0.984  |
| 135 | Petroselinic acid   |    | 0.658  |
| 136 | Rutaretin           |    | 0.204  |
| 137 | Santalol            |    | 0.233  |
| 138 | Sedanolid           |   | 0.964  |
| 139 | Sedanonic anhydride |  | 0.991  |
| 140 | Terpineol           |  | 0.014  |
| 141 | Umbelliferon        |  | 0.999  |
| 142 | $\alpha$ -selenin   |  | 0.284  |

| No. | Compound                                  | Structure                                                                            | F(30%) |
|-----|-------------------------------------------|--------------------------------------------------------------------------------------|--------|
| 143 | $\beta$ -myrcen                           | 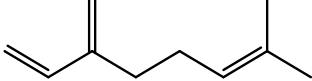   | 0.011  |
| 144 | $\beta$ -pinen                            |    | 0.004  |
| 145 | $\beta$ -selinen                          |    | 0.012  |
| 146 | D-selinen                                 |    | 0.881  |
| 147 | D-limonen                                 |    | 0.798  |
| 148 | Ocimen                                    |   | 0.075  |
| 149 | Stigmasterol                              |  | 0.185  |
| 150 | Seselin                                   |  | 0.952  |
| 151 | Apigenin 7-O-6''-malonylapiosyl-glucoside |  | 0.998  |
| 152 | Chrysoeriol                               |  | 0.998  |

| No. | Compound                                              | Structure                                                                          | F(30%) |
|-----|-------------------------------------------------------|------------------------------------------------------------------------------------|--------|
| 153 | Chrysoeriol 7- <i>O</i> -6"-malonyl-apiosyl-glucoside | 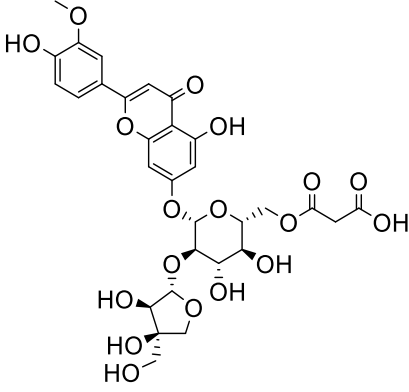 | 0.999  |
| 154 | Luteolin 7- <i>O</i> -6"-malonylglucoside             |  | 0.999  |
| 155 | Luteolin-7- <i>O</i> -glucoside                       |  | 0.999  |

**Table S2.** 1551 genes related to gout

| <b>No.</b> | <b>Target</b> | <b>No.</b> | <b>Target</b>   | <b>No.</b> | <b>Target</b> |
|------------|---------------|------------|-----------------|------------|---------------|
| 1          | HPRT1         | 518        | PVALEF          | 1035       | S100A12       |
| 2          | UMOD          | 519        | RFX3-AS1        | 1036       | ZFP57         |
| 3          | ABCG2         | 520        | TBX2-AS1        | 1037       | CELA3B        |
| 4          | PRPS1         | 521        | LHFPL3-AS1      | 1038       | ERAP2         |
| 5          | DARS2         | 522        | CASC17          | 1039       | G6PC2         |
| 6          | LDHD          | 523        | AADAACL2-AS1    | 1040       | KCNK16        |
| 7          | SLC2A9        | 524        | LOC101927855    | 1041       | IER3IP1       |
| 8          | SLC22A12      | 525        | DST-AS1         | 1042       | MIA2          |
| 9          | LOC107032760  | 526        | EIF3IP1         | 1043       | NFKBIL1       |
| 10         | SLC17A3       | 527        | LINC01398       | 1044       | ZFAND3        |
| 11         | XDH           | 528        | TOLLIP-DT       | 1045       | CCL18         |
| 12         | HNF1B         | 529        | LOC100128993    | 1046       | EXOSC4        |
| 13         | MUC1          | 530        | ANKRD20A9P      | 1047       | GCC1          |
| 14         | INS           | 531        | GPR199P         | 1048       | PPP1R3B       |
| 15         | SLC17A1       | 532        | LINC02724       | 1049       | CDC123        |
| 16         | SLC22A11      | 533        | FAAHP1          | 1050       | KIF12         |
| 17         | HNFJ3         | 534        | MIR6761         | 1051       | ZNHIT3        |
| 18         | IL1B          | 535        | SLC25A51P4      | 1052       | LACC1         |
| 19         | PDZK1         | 536        | LOC100287896    | 1053       | OLAH          |
| 20         | SLC16A9       | 537        | FTH1P22         | 1054       | SP6           |
| 21         | TNF           | 538        | LINC02372       | 1055       | KLF14         |
| 22         | APRT          | 539        | RPL18AP11       | 1056       | ANKS4B        |
| 23         | ALPK1         | 540        | RPS10P1         | 1057       | R3HDML        |
| 24         | ADSL          | 541        | ENSG00000254739 | 1058       | FABP12        |
| 25         | ALDH2         | 542        | ENSG00000259290 | 1059       | C2CD4A        |
| 26         | NLRP3         | 543        | ENSG00000250132 | 1060       | C2CD4B        |
| 27         | SLC22A6       | 544        | ENSG00000246982 | 1061       | CLTRN         |
| 28         | IL6           | 545        | ENSG00000261490 | 1062       | H19           |
| 29         | MEFV          | 546        | ENSG00000250829 | 1063       | MACIR         |
| 30         | P2RX7         | 547        | ENSG00000257767 | 1064       | TBC1D3G       |
| 31         | CXCL8         | 548        | ENSG00000272462 | 1065       | HYMAI         |
| 32         | ALDH16A1      | 549        | LARP1P1         | 1066       | MIR150        |

| <b>No.</b> | <b>Target</b> | <b>No.</b> | <b>Target</b>   | <b>No.</b> | <b>Target</b> |
|------------|---------------|------------|-----------------|------------|---------------|
| 33         | IL1R1         | 550        | H2AC10P         | 1067       | PLUT          |
| 34         | CARMIL1       | 551        | MRPS36P2        | 1068       | LOC108251801  |
| 35         | G6PC1         | 552        | ENSG00000256706 | 1069       | MAP3K7        |
| 36         | IL18          | 553        | ENSG00000257086 | 1070       | NFKBIA        |
| 37         | S100A9        | 554        | ENSG00000271857 | 1071       | HCK           |
| 38         | TLR4          | 555        | ENSG00000272218 | 1072       | CAT           |
| 39         | SEC61A1       | 556        | ARMC10P1        | 1073       | ITGAM         |
| 40         | ALB           | 557        | H2AC9P          | 1074       | FADD          |
| 41         | SLC22A8       | 558        | CYB5AP4         | 1075       | PIK3C2A       |
| 42         | SLC37A4       | 559        | H1-12P          | 1076       | TSHR          |
| 43         | PYCARD        | 560        | OR6M2P          | 1077       | EPHA3         |
| 44         | GAA           | 561        | RNU6-1270P      | 1078       | PLAA          |
| 45         | SLC22A13      | 562        | RNU7-185P       | 1079       | COX5A         |
| 46         | MC3R          | 563        | LOC105369980    | 1080       | MB            |
| 47         | GCKR          | 564        | ENSG00000248245 | 1081       | CDH10         |
| 48         | ANKH          | 565        | ENSG00000242798 | 1082       | DCDC2         |
| 49         | DNAJB11       | 566        | ENSG00000257261 | 1083       | DCBLD2        |
| 50         | HNF1A         | 567        | ENSG00000261584 | 1084       | VPS45         |
| 51         | APOE          | 568        | CYP4F34P        | 1085       | CCN2          |
| 52         | PFKM          | 569        | LINC02689       | 1086       | MYO18B        |
| 53         | OTULIN        | 570        | MRPS33P3        | 1087       | MRPS30        |
| 54         | LOC100130744  | 571        | RN7SKP93        | 1088       | KLHL5         |
| 55         | MAOA          | 572        | RN7SL496P       | 1089       | PRPSAP2       |
| 56         | PPAT          | 573        | RPL31P24        | 1090       | VSTM4         |
| 57         | RELN          | 574        | RPF2P2          | 1091       | ISCA1P1       |
| 58         | KCNJ11        | 575        | SNX18P26        | 1092       | ASS1P7        |
| 59         | ABCC8         | 576        | ENSG00000249219 | 1093       | IL2RA         |
| 60         | REN           | 577        | ENSG00000260743 | 1094       | PRL           |
| 61         | PRPS1L1       | 578        | ENSG00000287898 | 1095       | CLEC12A       |
| 62         | SYK           | 579        | Inc-DRD5-4      | 1096       | RHOD          |
| 63         | HNF4A         | 580        | Inc-ATG2B-2     | 1097       | PPARGC1B      |
| 64         | PAX2          | 581        | ENSG00000273015 | 1098       | RPS6KB1       |
| 65         | XPNPEP3       | 582        | ENSG00000286894 | 1099       | HMOX1         |
| 66         | BLK           | 583        | NONHSAG009952.2 | 1100       | PLAU          |

| <b>No.</b> | <b>Target</b> | <b>No.</b> | <b>Target</b>   | <b>No.</b> | <b>Target</b> |
|------------|---------------|------------|-----------------|------------|---------------|
| 67         | GCK           | 584        | piR-42491-087   | 1101       | BCL2          |
| 68         | PDX1          | 585        | MK280607-090    | 1102       | MAPT          |
| 69         | NEUROD1       | 586        | piR-38051-196   | 1103       | MAPK8         |
| 70         | PAX4          | 587        | NONHSAG022975.2 | 1104       | PTPRF         |
| 71         | KLF11         | 588        | NONHSAG047833.2 | 1105       | SERPINE1      |
| 72         | LRP6          | 589        | piR-32214-100   | 1106       | TUBB          |
| 73         | SLC12A3       | 590        | RF00017-5046    | 1107       | VIM           |
| 74         | SLC4A1        | 591        | HSALNG0033332   | 1108       | MVK           |
| 75         | SPTA1         | 592        | ENSG00000273088 | 1109       | NFE2L2        |
| 76         | CLCNKB        | 593        | ENSG00000287935 | 1110       | PLD1          |
| 77         | ANK1          | 594        | lnc-SLC37A2-4   | 1111       | PLA2G6        |
| 78         | SPTB          | 595        | lnc-SLC38A2-2   | 1112       | RHOA          |
| 79         | EPB42         | 596        | lnc-SMYD3-6     | 1113       | SCN1A         |
| 80         | PRPS2         | 597        | lnc-TMEM105-1   | 1114       | ACHE          |
| 81         | PRKG2         | 598        | lnc-WDR1-8      | 1115       | KIF5B         |
| 82         | APOA1         | 599        | lnc-RHEB-3      | 1116       | KNG1          |
| 83         | IL4           | 600        | lnc-RTKN2-4     | 1117       | GAL           |
| 84         | JAK2          | 601        | lnc-VKORC1L1-2  | 1118       | S100A4        |
| 85         | COMT          | 602        | L13714-395      | 1119       | SELE          |
| 86         | PTGS2         | 603        | lnc-ADIPOR2-3   | 1120       | DUSP19        |
| 87         | LEP           | 604        | lnc-ATE1-7      | 1121       | KIF16B        |
| 88         | CARD8         | 605        | lnc-HIST1H2BF-1 | 1122       | HCP5          |
| 89         | SHLD2         | 606        | lnc-COL21A1-8   | 1123       | PSORS1C1      |
| 90         | LPL           | 607        | lnc-GLUD1-1     | 1124       | LOC102724058  |
| 91         | GRHPR         | 608        | lnc-KRTCAP2-1   | 1125       | RPS6KB2       |
| 92         | NT5C2         | 609        | HSALNG0062380   | 1126       | MAPK1         |
| 93         | MSMB          | 610        | ENSG00000272166 | 1127       | INPP5D        |
| 94         | LRP2          | 611        | ENSG00000274591 | 1128       | ARHGAP26      |
| 95         | LDLR          | 612        | ENSG00000282988 | 1129       | ADSS2         |
| 96         | PNP           | 613        | GPATCH11P1      | 1130       | MIR155        |
| 97         | NPHP1         | 614        | CTB-49A3.2      | 1131       | SH3KBP1       |
| 98         | MOCOS         | 615        | MN309129        | 1132       | FUT2          |
| 99         | AMPD1         | 616        | NONHSAG003206.2 | 1133       | ACE           |
| 100        | CCL2          | 617        | piR-43408-017   | 1134       | TYMS          |



| <b>No.</b> | <b>Target</b> | <b>No.</b> | <b>Target</b>     | <b>No.</b> | <b>Target</b> |
|------------|---------------|------------|-------------------|------------|---------------|
| 101        | ATM           | 618        | piR-46852         | 1135       | CHKA          |
| 102        | LIPC          | 619        | piR-54765-015     | 1136       | CXCL2         |
| 103        | BCAS3         | 620        | piR-39098-249     | 1137       | CREBRF        |
| 104        | CPT2          | 621        | piR-52680-322     | 1138       | URAD          |
| 105        | CEL           | 622        | HSALNG0084800     | 1139       | COASY         |
| 106        | MPL           | 623        | lnc-UBASH3A-6     | 1140       | PIK3R1        |
| 107        | APPL1         | 624        | lnc-PDZK1-2       | 1141       | CBL           |
| 108        | TET2          | 625        | lnc-RUNX2-6       | 1142       | CD79A         |
| 109        | MLKL          | 626        | lnc-TFF3-2        | 1143       | IL12A         |
| 110        | FAM167A       | 627        | HSALNG0032849     | 1144       | SH3GL3        |
| 111        | INSL6         | 628        | lnc-GLUD1-6       | 1145       | PHGDH         |
| 112        | C12orf43      | 629        | lnc-KCNJ11-4      | 1146       | CD4           |
| 113        | INS-IGF2      | 630        | lnc-HIST1H2AD-2   | 1147       | SLCO1B1       |
| 114        | ADA           | 631        | HSALNG0090693     | 1148       | TF            |
| 115        | TGFB1         | 632        | HSALNG0062381     | 1149       | KLKB1         |
| 116        | PYGM          | 633        | HSALNG0082950     | 1150       | AKR1C3        |
| 117        | SLC12A1       | 634        | HSALNG0094020     | 1151       | C5            |
| 118        | INSR          | 635        | HSALNG0024737-002 | 1152       | BMP2          |
| 119        | TNFSF11       | 636        | HSALNG0007818     | 1153       | LCAT          |
| 120        | NGF           | 637        | HSALNG0024737-001 | 1154       | ARRB2         |
| 121        | MAF           | 638        | piR-41405-125     | 1155       | IVD           |
| 122        | SLC17A2       | 639        | MN309171          | 1156       | FADS1         |
| 123        | WDR1          | 640        | piR-33804-159     | 1157       | RBP4          |
| 124        | PRTFDC1       | 641        | piR-49423-021     | 1158       | REV3L         |
| 125        | CD14          | 642        | piR-31313         | 1159       | UGT1A9        |
| 126        | CNTN5         | 643        | piR-57138-043     | 1160       | CYP4A11       |
| 127        | ZNF724        | 644        | RF00017-4964      | 1161       | SLC7A6        |
| 128        | MIR302F       | 645        | piR-47223         | 1162       | NAT2          |
| 129        | NPHP4         | 646        | piR-57461-011     | 1163       | PPID          |
| 130        | SCARF1        | 647        | piR-60513         | 1164       | SLC10A2       |
| 131        | RMND1         | 648        | piR-59316-017     | 1165       | ALMS1         |
| 132        | SHROOM3       | 649        | piR-52594         | 1166       | GLS2          |
| 133        | SPATA5L1      | 650        | RF00017-3993      | 1167       | GPAA1         |
| 134        | CST9          | 651        | HSALNG0049690     | 1168       | PKD2L1        |

| <b>No.</b> | <b>Target</b> | <b>No.</b> | <b>Target</b>        | <b>No.</b> | <b>Target</b> |
|------------|---------------|------------|----------------------|------------|---------------|
| 135        | CCDC160       | 652        | lnc-TUBA3C-17        | 1169       | UGT1A6        |
| 136        | PKD2          | 653        | lnc-UBASH3A-7        | 1170       | UGT1A4        |
| 137        | CD160         | 654        | HSALNG0032847        | 1171       | CNTN4         |
| 138        | NIPAL1        | 655        | HSALNG0032851        | 1172       | ELOVL2        |
| 139        | APOB          | 656        | lnc-MBLAC1-2         | 1173       | UGT1A10       |
| 140        | NRXN2         | 657        | lnc-ACSM1-3          | 1174       | FFAR4         |
| 141        | TLR2          | 658        | lnc-HIST1H3D-1       | 1175       | FFAR1         |
| 142        | APP           | 659        | lnc-KCNJ11-1         | 1176       | HPS5          |
| 143        | ADK           | 660        | lnc-KMT2E-7          | 1177       | PDXDC1        |
| 144        | SLC6A3        | 661        | HSALNG0035738        | 1178       | UGT1A7        |
| 145        | FGA           | 662        | HSALNG0038925        | 1179       | UGT1A3        |
| 146        | ATIC          | 663        | HSALNG0035741        | 1180       | ABO           |
| 147        | ERCC6         | 664        | HSALNG0060278        | 1181       | UNC119B       |
| 148        | DGUOK         | 665        | HSALNG0094021        | 1182       | METTL6        |
| 149        | RAPGEF3       | 666        | HSALNG0050335        | 1183       | TRIM4         |
| 150        | RAPGEF4       | 667        | HSALNG0050337        | 1184       | UGT1A5        |
| 151        | GDA           | 668        | HSALNG0054805        | 1185       | DGCR5         |
| 152        | EN1           | 669        | HSALNG0073411        | 1186       | UOX           |
| 153        | THAP1         | 670        | HSALNG0012164-001    | 1187       | LINC01428     |
| 154        | VDR           | 671        | piR-48209-523        | 1188       | MTOR          |
| 155        | PPARA         | 672        | Hsa-Mir-95-P2_5p-007 | 1189       | FCN1          |
| 156        | CYP2C8        | 673        | HSALNG0110062        | 1190       | PIK3R2        |
| 157        | PRKAG2        | 674        | HSALNG0056912        | 1191       | WAS           |
| 158        | ADRB3         | 675        | HSALNG0013825        | 1192       | EPHA2         |
| 159        | ZNF518B       | 676        | HSALNG0030963        | 1193       | NT5E          |
| 160        | HLA-B         | 677        | FLT3                 | 1194       | THRB          |
| 161        | CLNK          | 678        | NOD2                 | 1195       | ALPL          |
| 162        | IL37          | 679        | UCP2                 | 1196       | PTK2B         |
| 163        | CSF2          | 680        | NR0B2                | 1197       | AHR           |
| 164        | R3HDM2        | 681        | SST                  | 1198       | IGF1          |
| 165        | CYP2E1        | 682        | MTHFR                | 1199       | ITPR1         |
| 166        | SLC2A6        | 683        | CHUK                 | 1200       | IRAK4         |
| 167        | IL10          | 684        | HLA-A                | 1201       | SCD           |
| 168        | APOC3         | 685        | ARID1B               | 1202       | ASS1          |

| <b>No.</b> | <b>Target</b> | <b>No.</b> | <b>Target</b> | <b>No.</b> | <b>Target</b> |
|------------|---------------|------------|---------------|------------|---------------|
| 169        | IL17A         | 686        | HLA-C         | 1203       | MASP1         |
| 170        | IL1RAPL2      | 687        | SCGN          | 1204       | HSP90AA1      |
| 171        | HP            | 688        | PIK3CG        | 1205       | TXNRD1        |
| 172        | MEN1          | 689        | NR1H3         | 1206       | TXNRD2        |
| 173        | CDC42BPG      | 690        | TREM1         | 1207       | PTK2          |
| 174        | GPT           | 691        | CCL3          | 1208       | CPS1          |
| 175        | HRH2          | 692        | YY1           | 1209       | AMPD2         |
| 176        | CSF1          | 693        | VEGFA         | 1210       | ACADM         |
| 177        | FGF5          | 694        | MC4R          | 1211       | ACADS         |
| 178        | TERT          | 695        | FYN           | 1212       | ETFDH         |
| 179        | LPA           | 696        | CTSB          | 1213       | MASP2         |
| 180        | MAP4K2        | 697        | KIT           | 1214       | SLC6A8        |
| 181        | RASGRP2       | 698        | IRS1          | 1215       | TXN           |
| 182        | SF1           | 699        | HHEX          | 1216       | PRODH         |
| 183        | KCNJ16        | 700        | TAGAP         | 1217       | PTH           |
| 184        | AICF          | 701        | CASR          | 1218       | CD27          |
| 185        | RREB1         | 702        | AGT           | 1219       | HDC           |
| 186        | PKLR          | 703        | ACTB          | 1220       | IL2           |
| 187        | SLC22A7       | 704        | SLC12A2       | 1221       | ENPEP         |
| 188        | INHBC         | 705        | CTCF          | 1222       | AKR1A1        |
| 189        | TFAP2A        | 706        | CETP          | 1223       | CASP5         |
| 190        | ADIPOQ        | 707        | PAX5          | 1224       | ITM2B         |
| 191        | LRP1          | 708        | PRDX2         | 1225       | CXCL10        |
| 192        | KTN1          | 709        | WNK1          | 1226       | NFIB          |
| 193        | GYG1          | 710        | ABCB11        | 1227       | CCL5          |
| 194        | AGL           | 711        | AQP1          | 1228       | BMP6          |
| 195        | GBE1          | 712        | EPB41         | 1229       | IGFBP1        |
| 196        | EGF           | 713        | HBB           | 1230       | CABIN1        |
| 197        | CD44          | 714        | KLF1          | 1231       | COG2          |
| 198        | IL12B         | 715        | RHAG          | 1232       | OPLAH         |
| 199        | ADH1B         | 716        | TRPM6         | 1233       | NLRP2         |
| 200        | SLC28A2       | 717        | AOX1          | 1234       | KIF3A         |
| 201        | S100A8        | 718        | ADCY10        | 1235       | LGALS9        |
| 202        | OIT3          | 719        | KCNJ10        | 1236       | EYA3          |

| <b>No.</b> | <b>Target</b> | <b>No.</b> | <b>Target</b> | <b>No.</b> | <b>Target</b> |
|------------|---------------|------------|---------------|------------|---------------|
| 203        | CST3          | 720        | GYPA          | 1237       | FLT3LG        |
| 204        | CXCL16        | 721        | STK39         | 1238       | IL1F10        |
| 205        | ABCC4         | 722        | SUOX          | 1239       | SLC16A10      |
| 206        | PON1          | 723        | THBS1         | 1240       | NAT8          |
| 207        | SLC17A5       | 724        | STK24         | 1241       | NUDT15        |
| 208        | BTF3P7        | 725        | SNCAIP        | 1242       | LECT2         |
| 209        | POMC          | 726        | SPTBN1        | 1243       | NLRP4         |
| 210        | TNFRSF1A      | 727        | WNK4          | 1244       | LILRA1        |
| 211        | HLA-DRB1      | 728        | APOA5         | 1245       | SUGT1         |
| 212        | PPARG         | 729        | BCL11A        | 1246       | ADSS1         |
| 213        | SIRT1         | 730        | USF1          | 1247       | NBPF3         |
| 214        | IL23R         | 731        | RPS3          | 1248       | EMC4          |
| 215        | NRBP1         | 732        | SEC23B        | 1249       | CNMD          |
| 216        | SRC           | 733        | CD34          | 1250       | LILRA3        |
| 217        | RELA          | 734        | CD47          | 1251       | MIR302B       |
| 218        | MYD88         | 735        | HBG1          | 1252       | MIR488        |
| 219        | SLC2A5        | 736        | GYPC          | 1253       | ELOVL2-AS1    |
| 220        | PDK2          | 737        | KLHL3         | 1254       | MIR920        |
| 221        | TRPM2         | 738        | RPS27A        | 1255       | MIR3936HG     |
| 222        | PCBD1         | 739        | SDC1          | 1256       | MIR4700       |
| 223        | LHX1          | 740        | SRI           | 1257       | URAHP         |
| 224        | CDH4          | 741        | ANK2          | 1258       | UGT1A         |
| 225        | UFM1          | 742        | ADD2          | 1259       | RAD17P1       |
| 226        | CDK5RAP3      | 743        | ANXA7         | 1260       | KRT18P30      |
| 227        | DDRGK1        | 744        | CLDN16        | 1261       | RPL29P5       |
| 228        | UFL1          | 745        | OSGEP         | 1262       | BTK           |
| 229        | MYH9          | 746        | HS2ST1        | 1263       | PIK3CA        |
| 230        | IL6R          | 747        | HS3ST1        | 1264       | GRB2          |
| 231        | CD40LG        | 748        | HS6ST1        | 1265       | FCN2          |
| 232        | MYO9A         | 749        | RHBDF2        | 1266       | PLEK          |
| 233        | TFRC          | 750        | RHD           | 1267       | DNM1          |
| 234        | GCG           | 751        | RPS3A         | 1268       | RPS6KA2       |
| 235        | TBXAS1        | 752        | CTCFL         | 1269       | SLC7A11       |
| 236        | CYP4B1        | 753        | BSND          | 1270       | FCN3          |

| <b>No.</b> | <b>Target</b> | <b>No.</b> | <b>Target</b> | <b>No.</b> | <b>Target</b> |
|------------|---------------|------------|---------------|------------|---------------|
| 237        | PANX1         | 754        | CLCNKA        | 1271       | MET           |
| 238        | HMGCR         | 755        | PGLYRP1       | 1272       | PTEN          |
| 239        | FGFR2         | 756        | USF2          | 1273       | PLCG1         |
| 240        | SFMBT1        | 757        | ST8SIA4       | 1274       | PIK3C2B       |
| 241        | TRIM46        | 758        | RPS23         | 1275       | IL7R          |
| 242        | MLXIP         | 759        | RPS16         | 1276       | SLC34A2       |
| 243        | SGK1          | 760        | WNK3          | 1277       | WWP2          |
| 244        | LPXN          | 761        | HS3ST2        | 1278       | DNM3          |
| 245        | LINC01010     | 762        | HBE1          | 1279       | RPS6          |
| 246        | CT69          | 763        | BLOC1S6       | 1280       | WWP1          |
| 247        | PPARGC1A      | 764        | LDB2          | 1281       | GLMN          |
| 248        | HGF           | 765        | LDB1          | 1282       | SGO1          |
| 249        | KCNQ1         | 766        | GLCE          | 1283       | ZNHIT6        |
| 250        | FOXA2         | 767        | HS3ST3B1      | 1284       | FGFR1         |
| 251        | JAZF1         | 768        | PIEZO1        | 1285       | FGFR3         |
| 252        | MMP2          | 769        | SACM1L        | 1286       | ITK           |
| 253        | PTPN11        | 770        | ZFPM1         | 1287       | ZAP70         |
| 254        | ABCB1         | 771        | DMTN          | 1288       | EP300         |
| 255        | GYS1          | 772        | GYPB          | 1289       | MERTK         |
| 256        | FBP1          | 773        | NPRL3         | 1290       | PDPK1         |
| 257        | GAPDH         | 774        | HS3ST3A1      | 1291       | KAT2B         |
| 258        | PC            | 775        | GTF3C1        | 1292       | CYP24A1       |
| 259        | NCOA3         | 776        | HS3ST6        | 1293       | IFIH1         |
| 260        | PHKA2         | 777        | HS3ST4        | 1294       | MTR           |
| 261        | PHKB          | 778        | VEZF1         | 1295       | MALT1         |
| 262        | APOC2         | 779        | HS3ST5        | 1296       | PRLR          |
| 263        | NCOA1         | 780        | DPH3          | 1297       | XPO1          |
| 264        | NCOA2         | 781        | PYDC1         | 1298       | ITCH          |
| 265        | FXYD2         | 782        | OR51V1        | 1299       | WASF1         |
| 266        | HFE           | 783        | OR51M1        | 1300       | ADM           |
| 267        | NFE2          | 784        | H3-2          | 1301       | EOMES         |
| 268        | G6PC3         | 785        | MMP2-AS1      | 1302       | SAE1          |
| 269        | SLC37A3       | 786        | IGHV4-38-2    | 1303       | PVR           |
| 270        | SLC37A1       | 787        | ABL1          | 1304       | S1PR1         |

| <b>No.</b> | <b>Target</b> | <b>No.</b> | <b>Target</b> | <b>No.</b> | <b>Target</b> |
|------------|---------------|------------|---------------|------------|---------------|
| 271        | PAGR1         | 788        | TYK2          | 1305       | S1PR2         |
| 272        | LIME1         | 789        | STAT1         | 1306       | STRADA        |
| 273        | H2AC18        | 790        | CSF1R         | 1307       | SP1           |
| 274        | MIR142        | 791        | MYC           | 1308       | KCNH7         |
| 275        | CRP           | 792        | BCL2L1        | 1309       | CALCA         |
| 276        | IGF1R         | 793        | CR1           | 1310       | CD86          |
| 277        | MMP3          | 794        | LAMA5         | 1311       | CDKN3         |
| 278        | HNF4G         | 795        | CLEC16A       | 1312       | MANBA         |
| 279        | PTX3          | 796        | FCRL3         | 1313       | RGS14         |
| 280        | G6PD          | 797        | BMPR2         | 1314       | PRPF31        |
| 281        | GATA1         | 798        | CASP1         | 1315       | ZFP36L1       |
| 282        | HBG2          | 799        | ACVRL1        | 1316       | AHI1          |
| 283        | TP53          | 800        | ACVR1B        | 1317       | BACH2         |
| 284        | B2M           | 801        | TUBB1         | 1318       | BIRC6         |
| 285        | F2            | 802        | ACVR2A        | 1319       | CXCR5         |
| 286        | GPI           | 803        | FRK           | 1320       | BATF          |
| 287        | TNFRSF11A     | 804        | HDAC7         | 1321       | ASAP1         |
| 288        | TEC           | 805        | B4GALT1       | 1322       | GCA           |
| 289        | FCGR3A        | 806        | USP2          | 1323       | TNFSF14       |
| 290        | ATG16L1       | 807        | ARNT          | 1324       | GPR65         |
| 291        | ABCF1         | 808        | DAB2          | 1325       | SLC15A2       |
| 292        | IL17REL       | 809        | ATXN2         | 1326       | MYNN          |
| 293        | MMP1          | 810        | MLXIPL        | 1327       | SLC30A7       |
| 294        | IFNG          | 811        | NFAT5         | 1328       | TMPRSS5       |
| 295        | PTGS1         | 812        | ADPGK         | 1329       | SOX8          |
| 296        | NR5A2         | 813        | INHBB         | 1330       | PRAME         |
| 297        | AMPD3         | 814        | ORC4          | 1331       | KIF15         |
| 298        | PRPSAP1       | 815        | LTBP3         | 1332       | NDFIP1        |
| 299        | SLC22A1       | 816        | P2RY6         | 1333       | PPP1R14C      |
| 300        | TNFRSF1B      | 817        | UBE2Q2        | 1334       | SP140         |
| 301        | KCNJ1         | 818        | BAZ1B         | 1335       | ARHGEF25      |
| 302        | TNFRSF10B     | 819        | ASAH2         | 1336       | ANKRD17       |
| 303        | SLC2A9-AS1    | 820        | HLF           | 1337       | ERGIC3        |
| 304        | MMP9          | 821        | STC1          | 1338       | DKKL1         |

| <b>No.</b> | <b>Target</b> | <b>No.</b> | <b>Target</b> | <b>No.</b> | <b>Target</b> |
|------------|---------------|------------|---------------|------------|---------------|
| 305        | MMP14         | 822        | DACH1         | 1339       | PLEKHA8       |
| 306        | SAA1          | 823        | AKT1S1        | 1340       | NFKBIZ        |
| 307        | GATA4         | 824        | NRG4          | 1341       | CEP85L        |
| 308        | ENO3          | 825        | INHBE         | 1342       | MPV17L2       |
| 309        | HADH          | 826        | OVOL1         | 1343       | ZBTB46        |
| 310        | PARK7         | 827        | SLC48A1       | 1344       | CALML4        |
| 311        | PFKP          | 828        | B3GNT4        | 1345       | CLECL1        |
| 312        | PFKL          | 829        | ANKRD55       | 1346       | ODF3B         |
| 313        | PGAM2         | 830        | MUSTN1        | 1347       | SEPTIN1       |
| 314        | FHL3          | 831        | QRICH2        | 1348       | PVT1          |
| 315        | MYOZ3         | 832        | TMEM171       | 1349       | ERBB2         |
| 316        | PPP1R3D       | 833        | MIR146A       | 1350       | MAP2K1        |
| 317        | PDGFRB        | 834        | LINC02875     | 1351       | RAF1          |
| 318        | STAT3         | 835        | C5orf67       | 1352       | AKT1          |
| 319        | UGT1A1        | 836        | B4GALT1-AS1   | 1353       | BRAF          |
| 320        | UGT1A8        | 837        | ADPGK-AS1     | 1354       | EGFR          |
| 321        | PRKCA         | 838        | LYN           | 1355       | CSNK2A1       |
| 322        | HMGB1         | 839        | KDR           | 1356       | NFKB1         |
| 323        | GLUD1         | 840        | MAPK14        | 1357       | CDH1          |
| 324        | RHEB          | 841        | CYP3A4        | 1358       | ITGB1         |
| 325        | VCAM1         | 842        | NOS2          | 1359       | MYB           |
| 326        | VWF           | 843        | TNFRSF11B     | 1360       | MAP3K1        |
| 327        | GAD1          | 844        | CTSL          | 1361       | PIM1          |
| 328        | IL1RN         | 845        | IDO1          | 1362       | RPS6KA1       |
| 329        | SLC22A4       | 846        | NOD1          | 1363       | TSC2          |
| 330        | IL1A          | 847        | CALCB         | 1364       | CBS           |
| 331        | TBX21         | 848        | TXNIP         | 1365       | ITGA6         |
| 332        | NTRK2         | 849        | LACTB         | 1366       | CSNK2B        |
| 333        | CFTR          | 850        | EZH2          | 1367       | GATA2         |
| 334        | RARB          | 851        | PDGFRA        | 1368       | MAPK3         |
| 335        | KCNJ2         | 852        | JAK1          | 1369       | PIK3CB        |
| 336        | MYL2          | 853        | DNMT3A        | 1370       | PRKCE         |
| 337        | ALDH1A2       | 854        | JAK3          | 1371       | RAC1          |
| 338        | DRD5          | 855        | IDH2          | 1372       | XIAP          |

| <b>No.</b> | <b>Target</b> | <b>No.</b> | <b>Target</b> | <b>No.</b> | <b>Target</b> |
|------------|---------------|------------|---------------|------------|---------------|
| 339        | MITF          | 856        | IDH1          | 1373       | FGR           |
| 340        | MAP3K11       | 857        | TH            | 1374       | PRKACG        |
| 341        | RUNX2         | 858        | ADAM17        | 1375       | ARF1          |
| 342        | ABCA1         | 859        | CALR          | 1376       | CD40          |
| 343        | ETV1          | 860        | ITGB3         | 1377       | BIRC3         |
| 344        | PPARD         | 861        | MPO           | 1378       | CSK           |
| 345        | PTGDR         | 862        | MMP13         | 1379       | BRD4          |
| 346        | WWOX          | 863        | NR2F2         | 1380       | HDAC9         |
| 347        | PDE1C         | 864        | PTPRC         | 1381       | ITGA3         |
| 348        | MYH11         | 865        | COL2A1        | 1382       | CYP27B1       |
| 349        | TOP2B         | 866        | DPP4          | 1383       | NCF2          |
| 350        | TRPA1         | 867        | ADCY5         | 1384       | MBL2          |
| 351        | TACR1         | 868        | ANXA1         | 1385       | NEDD4         |
| 352        | PTPRD         | 869        | OPRM1         | 1386       | RASA1         |
| 353        | SPP1          | 870        | MIF           | 1387       | TTN           |
| 354        | ABCC9         | 871        | PLA2G4A       | 1388       | TSC1          |
| 355        | BDKRB2        | 872        | MMP7          | 1389       | IRF8          |
| 356        | MAPKAPK5      | 873        | MMP8          | 1390       | PKD1          |
| 357        | MAPK6         | 874        | SLC2A2        | 1391       | PDK1          |
| 358        | SOX6          | 875        | SLC16A1       | 1392       | PRDX5         |
| 359        | WNT5B         | 876        | TTR           | 1393       | TRIO          |
| 360        | CASQ1         | 877        | RIPK1         | 1394       | PTGER4        |
| 361        | ABCG1         | 878        | STAT5B        | 1395       | VDAC1         |
| 362        | SLC13A3       | 879        | PTPN6         | 1396       | VAV1          |
| 363        | SMARCC1       | 880        | COMP          | 1397       | CORIN         |
| 364        | CACNA2D4      | 881        | FOXO1         | 1398       | CBX5          |
| 365        | CD2           | 882        | GATA6         | 1399       | CRHR1         |
| 366        | BAIAP2        | 883        | GGT1          | 1400       | BAG3          |
| 367        | BRSK2         | 884        | PAX6          | 1401       | BCL10         |
| 368        | ADIPOR2       | 885        | PCK1          | 1402       | KIF2C         |
| 369        | CLIC5         | 886        | NR1H2         | 1403       | PANK2         |
| 370        | DST           | 887        | MMP19         | 1404       | NCK1          |
| 371        | NDE1          | 888        | PTPN22        | 1405       | MAP3K14       |
| 372        | SLC38A1       | 889        | SERPINC1      | 1406       | S1PR3         |



| <b>No.</b> | <b>Target</b> | <b>No.</b> | <b>Target</b> | <b>No.</b> | <b>Target</b> |
|------------|---------------|------------|---------------|------------|---------------|
| 373        | TOLLIP        | 890        | ACAN          | 1407       | PTPRK         |
| 374        | ADAM15        | 891        | CSF3R         | 1408       | SHC1          |
| 375        | ARID5B        | 892        | ETV6          | 1409       | TCF7          |
| 376        | CDK13         | 893        | EPOR          | 1410       | TMPRSS2       |
| 377        | ERC1          | 894        | IRF5          | 1411       | RIPK4         |
| 378        | FANCE         | 895        | IL6ST         | 1412       | SCO2          |
| 379        | HIBADH        | 896        | GLP1R         | 1413       | HPN           |
| 380        | CUX2          | 897        | FOXP3         | 1414       | HAAO          |
| 381        | NTNG2         | 898        | HK2           | 1415       | FABP4         |
| 382        | OPN4          | 899        | IGF2          | 1416       | TRIM33        |
| 383        | MFN1          | 900        | HSPA5         | 1417       | DDAH1         |
| 384        | RAD52         | 901        | HSPD1         | 1418       | ALCAM         |
| 385        | SLC38A2       | 902        | PCK2          | 1419       | CFP           |
| 386        | SNCG          | 903        | PCSK1         | 1420       | EEF1D         |
| 387        | SMYD3         | 904        | MTNR1B        | 1421       | EIF4A3        |
| 388        | CACNA2D3      | 905        | MMP10         | 1422       | GLUD2         |
| 389        | ARID2         | 906        | NR4A2         | 1423       | GRB10         |
| 390        | ALX4          | 907        | SLC11A1       | 1424       | CYFIP2        |
| 391        | ATP1A4        | 908        | SLC5A2        | 1425       | KRT7          |
| 392        | ASH1L         | 909        | PRKAB1        | 1426       | PLA2G4C       |
| 393        | GABPA         | 910        | STAT4         | 1427       | RBX1          |
| 394        | GRID1         | 911        | TLR1          | 1428       | TNFRSF25      |
| 395        | GREM2         | 912        | DGKB          | 1429       | SP3           |
| 396        | NALCN         | 913        | BAD           | 1430       | SFTPD         |
| 397        | PIBF1         | 914        | ANXA5         | 1431       | TMPRSS3       |
| 398        | POLD3         | 915        | F5            | 1432       | WASF2         |
| 399        | RFX3          | 916        | GAD2          | 1433       | AGK           |
| 400        | SLC28A3       | 917        | ISL1          | 1434       | ARHGEF11      |
| 401        | TFF3          | 918        | KCNJ3         | 1435       | ADCYAP1       |
| 402        | TPST1         | 919        | FTO           | 1436       | KRT20         |
| 403        | SUCNR1        | 920        | MMP12         | 1437       | IL7           |
| 404        | SUPT3H        | 921        | MMP15         | 1438       | PKIA          |
| 405        | SV2B          | 922        | RELB          | 1439       | TNFRSF8       |
| 406        | TAX1BP1       | 923        | SLC19A2       | 1440       | TPD52         |

| <b>No.</b> | <b>Target</b> | <b>No.</b> | <b>Target</b> | <b>No.</b> | <b>Target</b> |
|------------|---------------|------------|---------------|------------|---------------|
| 407        | TAF6          | 924        | TCF7L2        | 1441       | CD6           |
| 408        | ACSM1         | 925        | REL           | 1442       | CD5           |
| 409        | BTN3A1        | 926        | STAT5A        | 1443       | CDC37         |
| 410        | KMT2E         | 927        | SERPINH1      | 1444       | AGAP2         |
| 411        | TAF11         | 928        | TRPV1         | 1445       | HNRNPF        |
| 412        | ACSM5         | 929        | WFS1          | 1446       | SLC16A4       |
| 413        | ACAD10        | 930        | CCR6          | 1447       | SRSF2         |
| 414        | AP4M1         | 931        | ALDOB         | 1448       | PSMC6         |
| 415        | AATK          | 932        | ALOX5AP       | 1449       | ZMIZ1         |
| 416        | BTN2A1        | 933        | CCR2          | 1450       | AP2A1         |
| 417        | ARL4A         | 934        | CTLA4         | 1451       | CENPA         |
| 418        | GALNTL5       | 935        | CIITA         | 1452       | BLZF1         |
| 419        | KCTD7         | 936        | FOXM1         | 1453       | CRHBP         |
| 420        | RBFOX1        | 937        | IRS2          | 1454       | CHST12        |
| 421        | RAB27B        | 938        | IGF2BP2       | 1455       | HBS1L         |
| 422        | PTGFRN        | 939        | HMGA2         | 1456       | NCKAP1        |
| 423        | THEM4         | 940        | HAMP          | 1457       | MLANA         |
| 424        | WDR4          | 941        | NLRP1         | 1458       | SAFB          |
| 425        | DHX15         | 942        | HGD           | 1459       | SESN3         |
| 426        | NSUN3         | 943        | SELP          | 1460       | ARF3          |
| 427        | WDR11         | 944        | PMPCA         | 1461       | CD58          |
| 428        | ACSM2A        | 945        | PSTPIP1       | 1462       | CLIC6         |
| 429        | ANO2          | 946        | PTPRN         | 1463       | EXTL2         |
| 430        | BTN2A2        | 947        | SOCS2         | 1464       | EDC4          |
| 431        | BTN3A2        | 948        | KITLG         | 1465       | EVI5          |
| 432        | ASB10         | 949        | IGFBP2        | 1466       | IL22RA2       |
| 433        | COL21A1       | 950        | IL17RA        | 1467       | OLIG3         |
| 434        | CNIH2         | 951        | MMP17         | 1468       | MAGEA1        |
| 435        | EI24          | 952        | IL13          | 1469       | PLCL2         |
| 436        | H1-4          | 953        | THBD          | 1470       | RGS1          |
| 437        | NAP1L5        | 954        | PRKCSH        | 1471       | THEMIS        |
| 438        | MED27         | 955        | TIMP1         | 1472       | AP2A2         |
| 439        | NAA25         | 956        | SOCS3         | 1473       | COPG2         |
| 440        | KIF26B        | 957        | SEC63         | 1474       | IL20RA        |

| <b>No.</b> | <b>Target</b> | <b>No.</b> | <b>Target</b> | <b>No.</b> | <b>Target</b> |
|------------|---------------|------------|---------------|------------|---------------|
| 441        | SLC17A4       | 958        | ADAMTS4       | 1475       | NCOA5         |
| 442        | TRMT112       | 959        | ADAMTS5       | 1476       | MAGEA3        |
| 443        | PKNOX2        | 960        | ASXL1         | 1477       | TIMMDC1       |
| 444        | PRDM8         | 961        | GHRL          | 1478       | XPO6          |
| 445        | CCDC68        | 962        | FABP1         | 1479       | BRK1          |
| 446        | ACSM2B        | 963        | FOXA1         | 1480       | ANKRD30A      |
| 447        | NIPSNAP3B     | 964        | PADI4         | 1481       | EFS           |
| 448        | SCAF11        | 965        | MIPEP         | 1482       | MMEL1         |
| 449        | THEM5         | 966        | MAFB          | 1483       | SVEP1         |
| 450        | RTKN2         | 967        | HLA-DQB1      | 1484       | ALPK2         |
| 451        | BTN3A3        | 968        | IL3           | 1485       | MRPS26        |
| 452        | ABT1          | 969        | SLC30A8       | 1486       | KIF21B        |
| 453        | FSTL4         | 970        | SLC30A10      | 1487       | PPIL4         |
| 454        | EVA1A         | 971        | U2AF1         | 1488       | CSN1S1        |
| 455        | LHFPL3        | 972        | PSMD9         | 1489       | NUTM1         |
| 456        | MMRN2         | 973        | CAMK1D        | 1490       | SH3BGRL2      |
| 457        | UHRF1BP1      | 974        | CAPN10        | 1491       | RGCC          |
| 458        | PXDNL         | 975        | BMP3          | 1492       | ZNF746        |
| 459        | ZMYM6         | 976        | CILP          | 1493       | TMEM39A       |
| 460        | ZMYM1         | 977        | HSPA4         | 1494       | CTAG1B        |
| 461        | ZFPL1         | 978        | IAPP          | 1495       | H3-4          |
| 462        | CNPY4         | 979        | GSTM1         | 1496       | SH2D4B        |
| 463        | HMGN4         | 980        | FABP2         | 1497       | MAMSTR        |
| 464        | KRTCAP2       | 981        | IFNA2         | 1498       | ZNF438        |
| 465        | SSUH2         | 982        | OSM           | 1499       | DLEU1         |
| 466        | PRDM15        | 983        | MNX1          | 1500       | INAVA         |
| 467        | ZNF639        | 984        | MAFA          | 1501       | H3C14         |
| 468        | DMBX1         | 985        | LTA           | 1502       | ST13P4        |
| 469        | GPR89A        | 986        | PADI2         | 1503       | IL12A-AS1     |
| 470        | FRMD4B        | 987        | NEUROG3       | 1504       | ZNF767P       |
| 471        | FBXL14        | 988        | KDM4C         | 1505       | MIR548AW      |
| 472        | NCKAP5        | 989        | TNFAIP6       | 1506       | MIR5699       |
| 473        | FAM53A        | 990        | PTGES         | 1507       | LOC285626     |
| 474        | ADIRF         | 991        | THPO          | 1508       | MIR5702       |

| <b>No.</b> | <b>Target</b> | <b>No.</b> | <b>Target</b> | <b>No.</b> | <b>Target</b> |
|------------|---------------|------------|---------------|------------|---------------|
| 475        | H1-3          | 992        | PTF1A         | 1509       | MIR5696       |
| 476        | H3C4          | 993        | ARAP1         | 1510       | LINC01147     |
| 477        | OR8D4         | 994        | CYB5R4        | 1511       | MIR5685       |
| 478        | OR13C8        | 995        | BCAM          | 1512       | MIR5687       |
| 479        | H2BC5         | 996        | EPO           | 1513       | MIR5694       |
| 480        | H4C8          | 997        | FSTL1         | 1514       | MIR5703       |
| 481        | H4C3          | 998        | FOLR2         | 1515       | MIR5706       |
| 482        | SLC22A18AS    | 999        | IFNB1         | 1516       | MIR5707       |
| 483        | ZNF322        | 1000       | ONECUT1       | 1517       | MIR548AT      |
| 484        | OR4D5         | 1001       | NKX2-2        | 1518       | MIR5695       |
| 485        | OR6M1         | 1002       | NKX6-1        | 1519       | MIR5680       |
| 486        | OR6T1         | 1003       | MICB          | 1520       | MIR5684       |
| 487        | H4C5          | 1004       | TNIP1         | 1521       | MIR5690       |
| 488        | MBLAC1        | 1005       | REG1A         | 1522       | MIR5688       |
| 489        | SMIM21        | 1006       | RFX6          | 1523       | MIR5692C2     |
| 490        | TMEM225       | 1007       | PPY           | 1524       | MIR5705       |
| 491        | C2orf16       | 1008       | STEAP4        | 1525       | MIR548AX      |
| 492        | DMAC1         | 1009       | PF4           | 1526       | MIR5692B      |
| 493        | H2AC7         | 1010       | ADAMTS12      | 1527       | MIR5692C1     |
| 494        | MALRD1        | 1011       | APOM          | 1528       | MIR5697       |
| 495        | H2BC7         | 1012       | CCRL2         | 1529       | MIR5700       |
| 496        | FAM25A        | 1013       | CDKAL1        | 1530       | MIR5681A      |
| 497        | REXO5         | 1014       | IL15          | 1531       | MIR5681B      |
| 498        | BTN2A3P       | 1015       | GLIS3         | 1532       | MIR5682       |
| 499        | CLDN24        | 1016       | IL19          | 1533       | MIR5691       |
| 500        | TMEM35B       | 1017       | RBP1          | 1534       | MIR5689       |
| 501        | NUTM2D        | 1018       | TSPAN8        | 1535       | MIR5693       |
| 502        | HCG11         | 1019       | BTNL2         | 1536       | MIR5704       |
| 503        | GUSBP2        | 1020       | BTLA          | 1537       | MIR5708       |
| 504        | MIR1250       | 1021       | CD177         | 1538       | MIR5698       |
| 505        | GBAP1         | 1022       | CSF3          | 1539       | MIR5701-1     |
| 506        | LINC01405     | 1023       | FIP1L1        | 1540       | MIR4666B      |
| 507        | LINC02903     | 1024       | IL23A         | 1541       | MIR5683       |
| 508        | NUTM2A-AS1    | 1025       | CTRB1         | 1542       | CFHR3         |

| <b>No.</b> | <b>Target</b> | <b>No.</b> | <b>Target</b> | <b>No.</b> | <b>Target</b> |
|------------|---------------|------------|---------------|------------|---------------|
| 509        | MIR3679       | 1026       | IFNA1         | 1543       | CFHR1         |
| 510        | MSC-AS1       | 1027       | IMMP2L        | 1544       | GSR           |
| 511        | BAIAP2-DT     | 1028       | GIP           | 1545       | MAT1A         |
| 512        | LMCD1-AS1     | 1029       | NKX6-2        | 1546       | GPATCH8       |
| 513        | LINC00940     | 1030       | MICA          | 1547       | UAQTL5        |
| 514        | LINC00944     | 1031       | MAEA          | 1548       | UAQTL6        |
| 515        | MIR5701-2     | 1032       | MIR5692A1     | 1549       | LMNA          |
| 516        | MRPS17P5      | 1033       | MIR5692A2     | 1550       | TBX19         |
| 517        | MIR5701-3     | 1034       | GDI2P1        | 1551       | HMCN1         |

**Table S3.** 779 targets of celery seed

| <b>No.</b> | <b>Target</b> | <b>No.</b> | <b>Target</b> | <b>No.</b> | <b>Target</b> |
|------------|---------------|------------|---------------|------------|---------------|
| 1          | ABAT          | 261        | ESRRB         | 521        | NMUR2         |
| 2          | ABCB1         | 262        | F10           | 522        | NOS1          |
| 3          | ABCC1         | 263        | F2            | 523        | NOS2          |
| 4          | ABCC9         | 264        | F2R           | 524        | NOS3          |
| 5          | ABCG2         | 265        | F3            | 525        | NOTUM         |
| 6          | ABHD6         | 266        | F9            | 526        | NPC1L1        |
| 7          | ACACB         | 267        | FAAH          | 527        | NPY5R         |
| 8          | ACE           | 268        | FABP1         | 528        | NQO1          |
| 9          | ACE2          | 269        | FABP2         | 529        | NQO2          |
| 10         | ACHE          | 270        | FABP3         | 530        | NR1H2         |
| 11         | ACLY          | 271        | FABP4         | 531        | NR1H3         |
| 12         | ACP1          | 272        | FABP5         | 532        | NR1H4         |
| 13         | ACPP          | 273        | FADS1         | 533        | NR1I2         |
| 14         | ACR           | 274        | FAP           | 534        | NR1I3         |
| 15         | ACVRL1        | 275        | FBP1          | 535        | NR3C1         |
| 16         | ADA           | 276        | FDFT1         | 536        | NR3C2         |
| 17         | ADAM17        | 277        | FDPS          | 537        | NT5E          |
| 18         | ADAM9         | 278        | FFAR1         | 538        | NTRK1         |
| 19         | ADAMTS5       | 279        | FGFR1         | 539        | NTRK2         |
| 20         | ADH1A         | 280        | FGFR3         | 540        | NTRK3         |
| 21         | ADH1B         | 281        | FGFR4         | 541        | NTSR1         |
| 22         | ADH1C         | 282        | FGR           | 542        | NUAK1         |
| 23         | ADH7          | 283        | FKBP1A        | 543        | OAT           |
| 24         | ADK           | 284        | FLT1          | 544        | OGA           |
| 25         | ADORA1        | 285        | FLT3          | 545        | OPRD1         |
| 26         | ADORA2A       | 286        | FLT4          | 546        | OPRK1         |
| 27         | ADORA2B       | 287        | FNTA          | 547        | OPRL1         |
| 28         | ADORA3        | 288        | FNTB          | 548        | OPRM1         |
| 29         | ADRA1A        | 289        | FOLH1         | 549        | P2RX3         |
| 30         | ADRA1B        | 290        | FOS           | 550        | P2RX7         |
| 31         | ADRA1D        | 291        | FPR2          | 551        | P4HTM         |
| 32         | ADRA2A        | 292        | FTO           | 552        | PABPC1        |

| <b>No.</b> | <b>Target</b> | <b>No.</b> | <b>Target</b> | <b>No.</b> | <b>Target</b> |
|------------|---------------|------------|---------------|------------|---------------|
| 33         | ADRA2B        | 293        | FUCA1         | 553        | PAM           |
| 34         | ADRA2C        | 294        | FURIN         | 554        | PAOX          |
| 35         | ADRB1         | 295        | FUT4          | 555        | PARP1         |
| 36         | ADRB2         | 296        | FUT7          | 556        | PARP10        |
| 37         | ADRB3         | 297        | FYN           | 557        | PARP2         |
| 38         | AGPAT2        | 298        | G6PD          | 558        | PCSK6         |
| 39         | AGTR1         | 299        | GAA           | 559        | PDCD4         |
| 40         | AHCY          | 300        | GABBR1        | 560        | PDE10A        |
| 41         | AKR1B1        | 301        | GABBR2        | 561        | PDE2A         |
| 42         | AKR1B10       | 302        | GABRA1        | 562        | PDE4A         |
| 43         | AKR1C3        | 303        | GABRA2        | 563        | PDE4B         |
| 44         | AKT1          | 304        | GABRA3        | 564        | PDE4D         |
| 45         | ALDH1A1       | 305        | GABRA4        | 565        | PDE5A         |
| 46         | ALDH2         | 306        | GABRA5        | 566        | PDE6D         |
| 47         | ALDH3A1       | 307        | GABRA6        | 567        | PDE7A         |
| 48         | ALDH5A1       | 308        | GABRB2        | 568        | PDE9A         |
| 49         | ALK           | 309        | GABRB3        | 569        | PDF           |
| 50         | ALOX15        | 310        | GABRG2        | 570        | PDGFRA        |
| 51         | ALOX15B       | 311        | GABRR1        | 571        | PDGFRB        |
| 52         | ALOX5         | 312        | GALR3         | 572        | PDPK1         |
| 53         | ALPG          | 313        | GAPDH         | 573        | PEPD          |
| 54         | ALPL          | 314        | GBA           | 574        | PER2          |
| 55         | AMPD1         | 315        | GBA2          | 575        | PGA5          |
| 56         | AMPD2         | 316        | GCGR          | 576        | PGC           |
| 57         | AMPD3         | 317        | GFPT1         | 577        | PGD           |
| 58         | ANPEP         | 318        | GLI1          | 578        | PGF           |
| 59         | AOC3          | 319        | GLI2          | 579        | PGGT1B        |
| 60         | APH1A         | 320        | GLO1          | 580        | PGR           |
| 61         | APH1B         | 321        | GLRA1         | 581        | PHF8          |
| 62         | APP           | 322        | GPBAR1        | 582        | PHLPP2        |
| 63         | AR            | 323        | GPR139        | 583        | PIK3C3        |
| 64         | ARG1          | 324        | GPR17         | 584        | PIK3CA        |
| 65         | ATP12A        | 325        | GPR35         | 585        | PIK3CB        |
| 66         | AURKA         | 326        | GPR84         | 586        | PIK3CD        |

| <b>No.</b> | <b>Target</b> | <b>No.</b> | <b>Target</b> | <b>No.</b> | <b>Target</b> |
|------------|---------------|------------|---------------|------------|---------------|
| 67         | AURKB         | 327        | GRIA1         | 587        | PIK3CG        |
| 68         | BACE1         | 328        | GRIA2         | 588        | PIK3R1        |
| 69         | BACE2         | 329        | GRIA4         | 589        | PIM1          |
| 70         | BAZ2A         | 330        | GRIK1         | 590        | PIM2          |
| 71         | BAZ2B         | 331        | GRIK2         | 591        | PIM3          |
| 72         | BBOX1         | 332        | GRIK3         | 592        | PIN1          |
| 73         | BCHE          | 333        | GRIK5         | 593        | PIP4K2C       |
| 74         | BCL2          | 334        | GRIN1         | 594        | PLA2G10       |
| 75         | BDKRB1        | 335        | GRIN2A        | 595        | PLA2G1B       |
| 76         | BMP1          | 336        | GRIN2B        | 596        | PLA2G2A       |
| 77         | BMX           | 337        | GRK2          | 597        | PLA2G2C       |
| 78         | BRAF          | 338        | GRK6          | 598        | PLA2G5        |
| 79         | BRD4          | 339        | GRM1          | 599        | PLAA          |
| 80         | C5AR1         | 340        | GRM2          | 600        | PLAT          |
| 81         | CA1           | 341        | GRM3          | 601        | PLAU          |
| 82         | CA12          | 342        | GRM4          | 602        | PLEC          |
| 83         | CA13          | 343        | GRM5          | 603        | PLG           |
| 84         | CA14          | 344        | GRM6          | 604        | PLK1          |
| 85         | CA2           | 345        | GRM7          | 605        | PLK4          |
| 86         | CA3           | 346        | GRM8          | 606        | PNMT          |
| 87         | CA4           | 347        | GSK3A         | 607        | PNP           |
| 88         | CA5A          | 348        | GSK3B         | 608        | POLA1         |
| 89         | CA5B          | 349        | GSR           | 609        | POLB          |
| 90         | CA6           | 350        | GZMB          | 610        | PPARA         |
| 91         | CA7           | 351        | HAO1          | 611        | PPARD         |
| 92         | CA9           | 352        | HCAR2         | 612        | PPARG         |
| 93         | CACNA1B       | 353        | HCAR3         | 613        | PPIA          |
| 94         | CACNA2D1      | 354        | HCRTR1        | 614        | PPP1CA        |
| 95         | CACNA2D2      | 355        | HCRTR2        | 615        | PREP          |
| 96         | CAPN1         | 356        | HDAC2         | 616        | PRKCA         |
| 97         | CAPN2         | 357        | HDAC3         | 617        | PRKCB         |
| 98         | CASP1         | 358        | HDAC4         | 618        | PRKCD         |
| 99         | CASP3         | 359        | HDAC5         | 619        | PRKCE         |
| 100        | CASP4         | 360        | HDAC6         | 620        | PRKCG         |



| <b>No.</b> | <b>Target</b> | <b>No.</b> | <b>Target</b> | <b>No.</b> | <b>Target</b> |
|------------|---------------|------------|---------------|------------|---------------|
| 101        | CASP6         | 361        | HDAC7         | 621        | PRKCH         |
| 102        | CASP7         | 362        | HDAC8         | 622        | PRKD1         |
| 103        | CASP8         | 363        | HDAC9         | 623        | PRKDC         |
| 104        | CASP9         | 364        | HEXA          | 624        | PRMT3         |
| 105        | CASR          | 365        | HEXB          | 625        | PRSS1         |
| 106        | CBFB          | 366        | HIF1A         | 626        | PSEN1         |
| 107        | CBR1          | 367        | HLA-A         | 627        | PSEN2         |
| 108        | CCKBR         | 368        | HLA-DRB3      | 628        | PSENE1        |
| 109        | CCNA1         | 369        | HLCS          | 629        | PSMB1         |
| 110        | CCNA2         | 370        | HMGCR         | 630        | PSMB2         |
| 111        | CCNB1         | 371        | HMOX1         | 631        | PTAFR         |
| 112        | CCNB2         | 372        | HPRT1         | 632        | PTGDR         |
| 113        | CCNB3         | 373        | HRH1          | 633        | PTGDR2        |
| 114        | CCNC          | 374        | HRH2          | 634        | PTGER1        |
| 115        | CCND1         | 375        | HRH3          | 635        | PTGER2        |
| 116        | CCND2         | 376        | HRH4          | 636        | PTGER3        |
| 117        | CCND3         | 377        | HSD11B1       | 637        | PTGER4        |
| 118        | CCNE1         | 378        | HSD11B2       | 638        | PTGES         |
| 119        | CCNE2         | 379        | HSD17B1       | 639        | PTGFR         |
| 120        | CCNH          | 380        | HSD17B2       | 640        | PTGIR         |
| 121        | CCNT1         | 381        | HSD17B3       | 641        | PTGIS         |
| 122        | CCR1          | 382        | HSP90AA1      | 642        | PTGS1         |
| 123        | CCR2          | 383        | HSP90AB1      | 643        | PTGS2         |
| 124        | CCR5          | 384        | HSPA1A        | 644        | PTK2          |
| 125        | CD38          | 385        | HSPA5         | 645        | PTPN1         |
| 126        | CD81          | 386        | HSPA8         | 646        | PTPN11        |
| 127        | CDA           | 387        | HTR1A         | 647        | PTPN2         |
| 128        | CDC25A        | 388        | HTR1B         | 648        | PTPN6         |
| 129        | CDC25B        | 389        | HTR1D         | 649        | PTPRA         |
| 130        | CDC42         | 390        | HTR1E         | 650        | PTPRC         |
| 131        | CDC45         | 391        | HTR2A         | 651        | PTPRF         |
| 132        | CDC7          | 392        | HTR2B         | 652        | PYGL          |
| 133        | CDK1          | 393        | HTR2C         | 653        | PYGM          |
| 134        | CDK2          | 394        | HTR3A         | 654        | QPCT          |

| <b>No.</b> | <b>Target</b> | <b>No.</b> | <b>Target</b> | <b>No.</b> | <b>Target</b> |
|------------|---------------|------------|---------------|------------|---------------|
| 135        | CDK4          | 395        | HTR4          | 655        | RAC1          |
| 136        | CDK5          | 396        | HTR5A         | 656        | RAD51         |
| 137        | CDK5R1        | 397        | HTR6          | 657        | RAF1          |
| 138        | CDK6          | 398        | HTR7          | 658        | RBP4          |
| 139        | CDK7          | 399        | ICAM1         | 659        | RELA          |
| 140        | CDK8          | 400        | ICMT          | 660        | REN           |
| 141        | CDK9          | 401        | IDH1          | 661        | RET           |
| 142        | CECR2         | 402        | IDO1          | 662        | RGS4          |
| 143        | CENPE         | 403        | IGF1R         | 663        | RIPK2         |
| 144        | CES1          | 404        | IKBKB         | 664        | RNPEP         |
| 145        | CES2          | 405        | IL2           | 665        | ROCK1         |
| 146        | CETP          | 406        | IMPDH1        | 666        | ROCK2         |
| 147        | CHEK1         | 407        | IMPDH2        | 667        | RORA          |
| 148        | CHRM1         | 408        | INSR          | 668        | RORC          |
| 149        | CHRM2         | 409        | ITGA2B        | 669        | ROS1          |
| 150        | CHRM3         | 410        | ITGA4         | 670        | RPS6KA3       |
| 151        | CHRM4         | 411        | ITGA5         | 671        | RPS6KB1       |
| 152        | CHRM5         | 412        | ITGAL         | 672        | RXRA          |
| 153        | CHRNA2        | 413        | ITGAV         | 673        | S1PR3         |
| 154        | CHRNA3        | 414        | ITGB1         | 674        | S1PR4         |
| 155        | CHRNA4        | 415        | ITGB2         | 675        | S1PR5         |
| 156        | CHRNA7        | 416        | ITGB3         | 676        | SAE1          |
| 157        | CHRNB2        | 417        | ITGB7         | 677        | SCD           |
| 158        | CHRNB4        | 418        | JAK1          | 678        | SCN10A        |
| 159        | CLK1          | 419        | JAK2          | 679        | SCN2A         |
| 160        | CLK4          | 420        | JAK3          | 680        | SCN4A         |
| 161        | CMA1          | 421        | JUN           | 681        | SCN5A         |
| 162        | CNR1          | 422        | KAT2B         | 682        | SELE          |
| 163        | CNR2          | 423        | KCNA3         | 683        | SERPINA6      |
| 164        | COMT          | 424        | KCNA5         | 684        | SERPINE1      |
| 165        | CPA1          | 425        | KCNE1         | 685        | SETD7         |
| 166        | CPA3          | 426        | KCNH2         | 686        | SHBG          |
| 167        | CPB1          | 427        | KCNJ11        | 687        | SHH           |
| 168        | CPB2          | 428        | KCNJ3         | 688        | SIGMAR1       |

| <b>No.</b> | <b>Target</b> | <b>No.</b> | <b>Target</b> | <b>No.</b> | <b>Target</b> |
|------------|---------------|------------|---------------|------------|---------------|
| 169        | CPN1          | 429        | KCNJ5         | 689        | SIRT1         |
| 170        | CPT1A         | 430        | KCNJ6         | 690        | SIRT2         |
| 171        | CPT1B         | 431        | KCNMA1        | 691        | SLC13A5       |
| 172        | CPT2          | 432        | KCNN4         | 692        | SLC15A1       |
| 173        | CREBBP        | 433        | KCNQ1         | 693        | SLC18A3       |
| 174        | CRHR1         | 434        | KDM1A         | 694        | SLC1A1        |
| 175        | CSF1R         | 435        | KDM2A         | 695        | SLC1A2        |
| 176        | CSNK1D        | 436        | KDM3A         | 696        | SLC22A6       |
| 177        | CSNK1G2       | 437        | KDM4A         | 697        | SLC27A1       |
| 178        | CSNK2A1       | 438        | KDM4B         | 698        | SLC2A1        |
| 179        | CTBP2         | 439        | KDM4C         | 699        | SLC5A1        |
| 180        | CTRB1         | 440        | KDM4E         | 700        | SLC6A1        |
| 181        | CTSA          | 441        | KDM5A         | 701        | SLC6A11       |
| 182        | CTSB          | 442        | KDM5B         | 702        | SLC6A12       |
| 183        | CTSC          | 443        | KDM5C         | 703        | SLC6A13       |
| 184        | CTSD          | 444        | KDM6B         | 704        | SLC6A2        |
| 185        | CTSE          | 445        | KDM7A         | 705        | SLC6A3        |
| 186        | CTSF          | 446        | KDR           | 706        | SLC6A4        |
| 187        | CTSG          | 447        | KIF11         | 707        | SLC6A7        |
| 188        | CTSH          | 448        | KISS1R        | 708        | SLC7A5        |
| 189        | CTSK          | 449        | KIT           | 709        | SLC9A1        |
| 190        | CTSL          | 450        | KLK1          | 710        | SQLE          |
| 191        | CTSS          | 451        | KLK2          | 711        | SRC           |
| 192        | CTSV          | 452        | KLKB1         | 712        | SRD5A1        |
| 193        | CXCR2         | 453        | KMO           | 713        | SRD5A2        |
| 194        | CYP11B1       | 454        | KYNU          | 714        | SREBF2        |
| 195        | CYP11B2       | 455        | LAP3          | 715        | SRM           |
| 196        | CYP17A1       | 456        | LCK           | 716        | ST3GAL3       |
| 197        | CYP19A1       | 457        | LIG1          | 717        | STAT1         |
| 198        | CYP1A2        | 458        | LIPA          | 718        | STAT3         |
| 199        | CYP1B1        | 459        | LIPE          | 719        | STK26         |
| 200        | CYP27A1       | 460        | LRRK2         | 720        | STK3          |
| 201        | CYP2C19       | 461        | LSS           | 721        | STK4          |
| 202        | CYP2C9        | 462        | LTA4H         | 722        | SYK           |

| <b>No.</b> | <b>Target</b> | <b>No.</b> | <b>Target</b> | <b>No.</b> | <b>Target</b> |
|------------|---------------|------------|---------------|------------|---------------|
| 203        | CYP2D6        | 463        | LTB4R         | 723        | TAAR1         |
| 204        | CYP51A1       | 464        | LYN           | 724        | TACR1         |
| 205        | DAO           | 465        | MAOA          | 725        | TACR2         |
| 206        | DBH           | 466        | MAOB          | 726        | TAS2R31       |
| 207        | DCTPP1        | 467        | MAP2          | 727        | TBXA2R        |
| 208        | DHCR7         | 468        | MAP2K1        | 728        | TBXAS1        |
| 209        | DHFR          | 469        | MAP2K7        | 729        | TDO2          |
| 210        | DLG4          | 470        | MAP3K14       | 730        | TDP1          |
| 211        | DNMT3A        | 471        | MAP3K8        | 731        | TDP2          |
| 212        | DNMT3B        | 472        | MAP4K4        | 732        | TERT          |
| 213        | DNPEP         | 473        | MAPK1         | 733        | TGFBR1        |
| 214        | DPP4          | 474        | MAPK10        | 734        | TGM2          |
| 215        | DPP8          | 475        | MAPK14        | 735        | TH            |
| 216        | DPP9          | 476        | MAPK3         | 736        | THRA          |
| 217        | DRD1          | 477        | MAPK8         | 737        | THRB          |
| 218        | DRD2          | 478        | MAPK9         | 738        | TIE1          |
| 219        | DRD3          | 479        | MAPKAPK2      | 739        | TK1           |
| 220        | DRD4          | 480        | MB            | 740        | TKT           |
| 221        | DUSP3         | 481        | MC1R          | 741        | TLR4          |
| 222        | DYRK1A        | 482        | MC4R          | 742        | TLR9          |
| 223        | DYRK1B        | 483        | MCHR1         | 743        | TNFRSF10A     |
| 224        | EBP           | 484        | MCL1          | 744        | TNKS          |
| 225        | ECE1          | 485        | MDM2          | 745        | TNKS2         |
| 226        | EDNRA         | 486        | MERTK         | 746        | TNNC1         |
| 227        | EDNRB         | 487        | MET           | 747        | TNNI3         |
| 228        | EGFR          | 488        | METAP1        | 748        | TNNT2         |
| 229        | EGLN1         | 489        | MGLL          | 749        | TOP1          |
| 230        | EGLN3         | 490        | MIF           | 750        | TOP2A         |
| 231        | EHMT1         | 491        | MKNK1         | 751        | TPMT          |
| 232        | EHMT2         | 492        | MKNK2         | 752        | TPO           |
| 233        | EIF2AK1       | 493        | MME           | 753        | TRAP1         |
| 234        | EIF4E         | 494        | MMEL1         | 754        | TRPA1         |
| 235        | ELANE         | 495        | MMP1          | 755        | TRPM8         |
| 236        | ELOVL6        | 496        | MMP10         | 756        | TRPV1         |

| <b>No.</b> | <b>Target</b> | <b>No.</b> | <b>Target</b> | <b>No.</b> | <b>Target</b> |
|------------|---------------|------------|---------------|------------|---------------|
| 237        | ENPEP         | 497        | MMP12         | 757        | TRPV3         |
| 238        | EP300         | 498        | MMP13         | 758        | TSPO          |
| 239        | EPAS1         | 499        | MMP14         | 759        | TTK           |
| 240        | EPHA1         | 500        | MMP2          | 760        | TTL           |
| 241        | EPHA2         | 501        | MMP3          | 761        | TTR           |
| 242        | EPHA3         | 502        | MMP7          | 762        | TUBB1         |
| 243        | EPHA4         | 503        | MMP8          | 763        | TYK2          |
| 244        | EPHA5         | 504        | MMP9          | 764        | TYMP          |
| 245        | EPHA6         | 505        | MPI           | 765        | TYMS          |
| 246        | EPHA7         | 506        | MPO           | 766        | TYR           |
| 247        | EPHA8         | 507        | MST1R         | 767        | UBA2          |
| 248        | EPHB1         | 508        | MTAP          | 768        | UGCG          |
| 249        | EPHB2         | 509        | MT-ND4        | 769        | UGT2B7        |
| 250        | EPHB3         | 510        | MTNR1A        | 770        | UPP1          |
| 251        | EPHB4         | 511        | MTNR1B        | 771        | UTS2R         |
| 252        | EPHB6         | 512        | MTOR          | 772        | VDR           |
| 253        | EPHX1         | 513        | MYLK          | 773        | VEGFA         |
| 254        | EPHX2         | 514        | NAAA          | 774        | WDR5          |
| 255        | ERAP2         | 515        | NAMPT         | 775        | XDH           |
| 256        | ERBB2         | 516        | NAT1          | 776        | XIAP          |
| 257        | ERBB4         | 517        | NCSTN         | 777        | XPO1          |
| 258        | ERN1          | 518        | NEK1          | 778        | YARS          |
| 259        | ESR1          | 519        | NGFR          | 779        | ZAP70         |
| 260        | ESR2          | 520        | NISCH         |            |               |

**Table S4.** Molecular interaction between the potent compounds of celery seed and core targets of gout disease

| Potent compounds | Core targets       | Free binding energy (kcal/mol) | Interacted residues    |                                                                |
|------------------|--------------------|--------------------------------|------------------------|----------------------------------------------------------------|
|                  |                    |                                | Hydrogen bond          | Other interactions                                             |
| C1               | AKT1               | -7.6                           | Thr291, Asp292         | Val164, Ala177, Lys179, Met281                                 |
|                  | EGFR kinase        | -7.9                           | -                      | Leu718, Val726, Leu844, Ala743, Lys745, Leu777, Leu788, Met766 |
|                  | ERK1               | -7.3                           | Asp128                 | Leu173, Ile48, Val56, Ala69, Cys183, Ile101                    |
|                  | ERK2               | -7.0                           | Asp165, Gln103         | Val37, Ala50, Ile29, Met106, Leu105, Leu154                    |
|                  | HSP90 $\alpha$     | -9.2                           | Tyr139                 | Trp162, Phe138, Leu107, Met98, Val150, Val186                  |
|                  | Integrin $\beta$ 1 | -5.9                           | Lys334                 | Ile363, Pro333, Leu428                                         |
|                  | JNK1               | -7.9                           | Arg69                  | Leu168, Val40, Ala53, Met108, Ile32, Ile86, Val158, Met111     |
|                  | MAPK14             | -9.6                           | Thr106, His107         | Lys53, Phe169, Ala51, Val38, Val30, Tyr35, Leu108              |
|                  | NF- $\kappa$ B p65 | -6.7                           | Thr60, His58, Gln114   | Ile24                                                          |
|                  | NO synthase        | -9.0                           | Val352, Asn370         | Val352, Tyr373, Glu377, Pro350                                 |
| PI3K $\alpha$    | -7.7               | Arg818, Gln630                 | Phe666, Arg662, Lys271 |                                                                |

| Potent compounds | Core targets       | Free binding energy (kcal/mol) | Interacted residues            |                                        |
|------------------|--------------------|--------------------------------|--------------------------------|----------------------------------------|
|                  |                    |                                | Hydrogen bond                  | Other interactions                     |
|                  | PPAR $\alpha$      | -8.4                           | Tyr334                         | Thr279, Val324, Met220, Met320         |
| C2               | AKT1               | -7.5                           | Lys158                         | Phe161, Leu181, Ile186                 |
|                  | EGFR kinase        | -7.0                           | Tyr998, Asp800, Gly796         | Leu792, Leu844, Leu718                 |
|                  | ERK1               | -6.6                           | Met125                         | Cys183                                 |
|                  | ERK2               | -7.0                           | Glu69, Gln103                  | Val37, Lys52                           |
|                  | HSP90 $\alpha$     | -7.1                           | Ser52, Gly135                  | Phe138, Leu107, Met98, Ala55           |
|                  | Integrin $\beta$ 1 | -4.9                           | Asn330                         | Leu428                                 |
|                  | JNK1               | -7.0                           | Ser155, Met111                 | Ala36, Val40, Leu168                   |
|                  | MAPK14             | -7.1                           | Thr106, Met109                 | Tyr35, Val30                           |
|                  | NF- $\kappa$ B p65 | -5.0                           | Ser112                         | Arg108                                 |
|                  | NO synthase        | -7.5                           | Gly371, Asn370, Glu377, Arg381 | Ala262                                 |
|                  | PI3K $\alpha$      | -6.9                           | Lys271, Asn170, Pro835         | Phe666                                 |
|                  | PPAR $\alpha$      | -7.3                           | Tyr334, Met320, Tyr214         | Ile317, Val324, Met220                 |
| C3               | AKT1               | -5.9                           | Leu295                         | Phe161, Lys179, Glu191                 |
|                  | EGFR kinase        | -6.7                           | Thr854, Asp855                 | Cys775, Thr790, Ala743, Val726, Lys745 |
|                  | ERK1               | -5.7                           | Met125                         | Ile173, Cys183, Ala69, Val56           |
|                  | ERK2               | -5.3                           | -                              | Leu154, Ala50, Ile29, Val37            |
|                  | HSP90 $\alpha$     | -7.4                           | Tyr139, Gly108                 | Ile26, Val150, Trp162, Leu103, Phe138  |
|                  | Integrin $\beta$ 1 | -4.3                           | Leu86, Lys85                   | Leu86                                  |

| Potent compounds   | Core targets       | Free binding energy (kcal/mol) | Interacted residues    |                                                |
|--------------------|--------------------|--------------------------------|------------------------|------------------------------------------------|
|                    |                    |                                | Hydrogen bond          | Other interactions                             |
|                    | JNK1               | -5.7                           | Asn114                 | Val40, Ala53, Leu168, Val158                   |
|                    | MAPK14             | -6.9                           | -                      | Phe169, Tyr35, Val38, Ala51, Leu75             |
|                    | NF- $\kappa$ B p65 | -5.0                           | Tyr100                 | Lys93, Phe113, His111                          |
|                    | NO synthase        | -6.8                           | -                      | Pro350, Tyr373                                 |
|                    | PI3K $\alpha$      | -5.9                           | -                      | Leu839, Phe666                                 |
|                    | PPAR $\alpha$      | -6.6                           | Ser280                 | Cys276, Ile354, Val444, Tyr464, Phe273, Leu456 |
|                    | C4                 | AKT1                           | -6.0                   | Glu234                                         |
| EGFR kinase        |                    | -6.5                           | Thr854, Lys745, Asp855 | Val726, Leu718, Leu844, Ala743                 |
| ERK1               |                    | -6.1                           | Thr127, Met125, Cys183 | Val56, Leu173                                  |
| ERK2               |                    | -6.0                           | -                      | Ile82, Leu14, Ala50, Val37                     |
| HSP90 $\alpha$     |                    | -7.4                           | Leu103, Asn51, Tyr139  | Met98, Phe138, Leu107, Ala111, Tyr139          |
| Integrin $\beta$ 1 |                    | -5.0                           | Thr388, Asn391, Lys394 | Lys394                                         |
| JNK1               |                    | -6.2                           | Glu109                 | Val40, Met108, Leu168, Ala53                   |
| MAPK14             |                    | -6.1                           | Arg67, Gly170          | Asp168, Leu74, Leu75                           |
| NF- $\kappa$ B p65 |                    | -5.0                           | Gln114, Arg108         | His111                                         |
| NO synthase        |                    | -7.0                           | Pro350, Gln262, Val352 | Pro350, Tyr373, Glu377, Val352                 |



| Potent compounds | Core targets       | Free binding energy (kcal/mol) | Interacted residues                            |                                                       |
|------------------|--------------------|--------------------------------|------------------------------------------------|-------------------------------------------------------|
|                  |                    |                                | Hydrogen bond                                  | Other interactions                                    |
|                  | PI3K $\alpha$      | -6.7                           | Cys838                                         | Arg818, Phe666, Leu839, His670                        |
|                  | PPAR $\alpha$      | -7.1                           | Thr283, Ala333, Tyr334                         | Val324, Leu321, Met330, Tyr334                        |
| C5               | AKT1               | -9.6                           | Lys158, Gly162, Glu191, Gly294                 | Phe161, Lys179, Glu198, Leu295                        |
|                  | EGFR kinase        | -8.7                           | Thr854, Asp855, Asn842, Arg841, Gly719, Ser720 | Leu718, Ala743, Leu844, Lys745, Val726, Cys797        |
|                  | ERK1               | -8.2                           | Lys71, Tyr53, Arg84, Asp184, Glu88             | Asp184, Ala52                                         |
|                  | ERK2               | -8.5                           | Lys52, Gln103, Cys164, Glu69, Met106           | Lys52, Cys164, Val37, Leu154, Ala50                   |
|                  | HSP90 $\alpha$     | -9.6                           | Gly135, Asn51, Leu107                          | Phe138, Val150, Leu103, Trp162, Met98, Leu107, Ile110 |
|                  | Integrin $\beta$ 1 | -6.8                           | Phe262, Val324                                 | Pro228, Phe262                                        |
|                  | JNK1               | -7.9                           | Ser155, Arg69                                  | Lys153, Ser34, Leu168, Val40, Met108                  |
|                  | MAPK14             | -8.2                           | Asp168, Arg67                                  | Leu74, Arg70, Arg149                                  |
|                  | NF- $\kappa$ B p65 | -6.8                           | Tyr100, Gln114, Asn115, Cys105, His111, Asp103 | Phe113, Val72, Ala102, Lys93                          |
|                  | NO synthase        | -10.1                          | Gln263, Arg388, Arg266, Gly371, Trp372         | Arg381, Pro350                                        |
|                  | PI3K $\alpha$      | -8.8                           | Cys838, Gln630                                 | Lys271, Phe666, Arg818, Leu839                        |

| Potent compounds | Core targets       | Free binding energy (kcal/mol) | Interacted residues            |                                                                |
|------------------|--------------------|--------------------------------|--------------------------------|----------------------------------------------------------------|
|                  |                    |                                | Hydrogen bond                  | Other interactions                                             |
|                  | PPAR $\alpha$      | -9.6                           | Tyr464, Tyr314, Ser280         | Leu460, Val444, Phe273, His440, Cys276, Thr279, Leu321, Met355 |
| C6               | AKT1               | -6.4                           | Asp292                         | Val164, Ala177, Met281                                         |
|                  | EGFR kinase        | -7.0                           | Thr854                         | Val726, Ala743, Lys745                                         |
|                  | ERK1               | -6.3                           | Met125, Glu126                 | Ile48, Leu173, Val56                                           |
|                  | ERK2               | -5.9                           | Met106, Glu107                 | Leu154                                                         |
|                  | HSP90 $\alpha$     | -7.1                           | Tyr139                         | Phe138, Leu107                                                 |
|                  | Integrin $\beta$ 1 | -6.4                           | Ser335, Lys329, Lys334, Pro333 | Ile363                                                         |
|                  | JNK1               | -6.4                           | Met111, Glu109                 | Val158, Ile32                                                  |
|                  | MAPK14             | -7.1                           | Asp168, Thr106                 | Lys53, Ala51, Val38                                            |
|                  | NF- $\kappa$ B p65 | -6.4                           | Ser112, Thr60, His58, Arg50    | -                                                              |
|                  | NO synthase        | -7.7                           | Gln262, Tyr347, Asp382, Tyr373 | Glu377                                                         |
|                  | PI3K $\alpha$      | -6.9                           | His670, Cys838                 | Arg818, Phe666                                                 |
| PPAR $\alpha$    | -7.1               | Glu286, Asn219, Thr283         | Val324                         |                                                                |
| C7               | AKT1               | -5.4                           | -                              | Val164, Lys179                                                 |
|                  | EGFR kinase        | -6.6                           | Thr854, Asp855, Met766         | Leu844, Ala743, Val726                                         |
|                  | ERK1               | -5.7                           | Asp128                         | Ile48                                                          |
|                  | ERK2               | -5.6                           | Met106                         | Lys52, Val37                                                   |
|                  | HSP90 $\alpha$     | -6.7                           | Tyr139, Leu103                 | Trp162, Val150, Phe138                                         |
|                  | Integrin $\beta$ 1 | -3.8                           | -                              | Ile363, Arg393                                                 |
|                  | JNK1               | -5.6                           | -                              | Ile32                                                          |
|                  | MAPK14             | -6.7                           | Asp168, Thr106                 | Leu108, Ala51                                                  |

| Potent compounds | Core targets       | Free binding energy (kcal/mol) | Interacted residues                    |                                               |
|------------------|--------------------|--------------------------------|----------------------------------------|-----------------------------------------------|
|                  |                    |                                | Hydrogen bond                          | Other interactions                            |
|                  | NF-κB p65          | -5.2                           | Tyr100, Arg108                         | Ser112, Val72, Phe113, Ala102, Tyr100         |
|                  | NO synthase        | -6.3                           | Asp382, Tyr347                         | Gln263, Val352                                |
|                  | PI3K $\alpha$      | -6.2                           | Leu632, Ser629                         | Ile633, Phe666                                |
|                  | PPAR $\alpha$      | -6.2                           | Thr283, Met220                         | Met320, Ile317                                |
| C8               | AKT1               | -6.0                           | Glu191                                 | Phe161, Lys179, Leu181, Glu191, Leu295        |
|                  | EGFR kinase        | -6.3                           | Lys745                                 | Val726, Ala743, Leu844, Leu858, Met766        |
|                  | ERK1               | -6.0                           | Tyr53, Ala52, Gly54                    | Glu88, Lys71, Ile73                           |
|                  | ERK2               | -5.6                           | -                                      | Leu154, Ala50, Ile29, Lys52, Val37            |
|                  | HSP90 $\alpha$     | -6.9                           | -                                      | Val186, Met98, Trp162, Leu103, Leu107, Phe138 |
|                  | Integrin $\beta$ 1 | -5.1                           | -                                      | Ile363, Lys394                                |
|                  | JNK1               | -6.0                           | Asn114                                 | Val40, Met111, Ile86, Ala53, Leu168, Val158   |
|                  | MAPK14             | -7.3                           | Thr106                                 | Lys53, Tyr35, Val30                           |
|                  | NF-κB p65          | -5.2                           | Tyr100                                 | Lys93                                         |
|                  | NO synthase        | -6.9                           |                                        | Val352, Pro350                                |
|                  | PI3K $\alpha$      | -6.1                           | Arg818                                 | Leu755, Leu839, Phe666, His670, Leu632        |
| PPAR $\alpha$    | -6.9               | Tyr464                         | Val444, Phe273, Ile354, Phe351, Ile272 |                                               |
| C9               | AKT1               | -5.9                           | Arg241, Asp439                         | Glu234                                        |

| Potent compounds   | Core targets       | Free binding energy (kcal/mol) | Interacted residues                    |                                                    |
|--------------------|--------------------|--------------------------------|----------------------------------------|----------------------------------------------------|
|                    |                    |                                | Hydrogen bond                          | Other interactions                                 |
|                    | EGFR kinase        | -6.6                           | Thr854                                 | Phe856, Thr790, Ala743, Val726, Lys745, Asp855     |
|                    | ERK1               | -5.9                           | -                                      | Ile73                                              |
|                    | ERK2               | -5.6                           | -                                      | Val37, Ala50, Lys52                                |
|                    | HSP90 $\alpha$     | -7.8                           | Trp162, Leu103                         | Met98, Leu107, Val150, Phe138                      |
|                    | Integrin $\beta$ 1 | -5.1                           | Ser33                                  | Ile363, Lys394                                     |
|                    | JNK1               | -6.0                           | Gln117, Asn114                         | Met108, Ala53, Val158, Leu168                      |
|                    | MAPK14             | -7.1                           | Lys53                                  | Val38, Tyr35, Phe169, Ala51                        |
|                    | NF- $\kappa$ B p65 | -5.3                           | Asp103, Cys105, Tyr100                 | Tyr100                                             |
|                    | NO synthase        | -7.0                           | -                                      | Pro350, Glu377, Val352                             |
|                    | PI3K $\alpha$      | -6.5                           | Cys838                                 | Phe666                                             |
|                    | PPAR $\alpha$      | -6.8                           |                                        | Ile354, Cys276, Ile272                             |
|                    | C10                | AKT1                           | -7.2                                   | Asp292, Gly294                                     |
| EGFR kinase        |                    | -7.1                           | Arg841, Asn842, Asp855, Thr854, Lys745 | Val726, Ala743, Leu844, Lys745                     |
| ERK1               |                    | -6.8                           | Cys183, Glu126, Asp128                 | Lys71, Val56, Ala69, Leu173, Ile48, Leu124, Met125 |
| ERK2               |                    | -6.7                           | Met106, Asp104, Asp109, Cys164         | Ala50, Ile29, Leu154, Lys152, Val37                |
| HSP90 $\alpha$     |                    | -8.3                           | Tyr139, Leu107, Asn51, Asp102          | Trp162, Phe138, Val150, Met98                      |
| Integrin $\beta$ 1 |                    | -6.2                           | Ser335, Lys329, Ile332, Lys394         | Ile363, Pro333                                     |

| Potent compounds   | Core targets       | Free binding energy (kcal/mol) | Interacted residues                            |                                                   |
|--------------------|--------------------|--------------------------------|------------------------------------------------|---------------------------------------------------|
|                    |                    |                                | Hydrogen bond                                  | Other interactions                                |
|                    | JNK1               | -6.5                           | Ser155, Ser34, Ile32                           | Leu168, Val40, Met108                             |
|                    | MAPK14             | -7.3                           | Asp168, Glu71, Arg67                           | Arg70, Glu71, Leu75, Leu74                        |
|                    | NF- $\kappa$ B p65 | -6.3                           | Tyr100, Gln14, Asn115, Ser112                  | Ala102                                            |
|                    | NO synthase        | -7.4                           | Tyr347, Gln263, Tyr373, Glu377, Phe369, Trp372 | Pro350, Val352                                    |
|                    | PI3K $\alpha$      | -7.3                           | Met811, Arg818, Cys838                         | Arg818, Met811, Leu632, Phe666, His670            |
|                    | PPAR $\alpha$      | -7.5                           | Ile317, Met320, Thr283, Val332, Ala333         | Leu321, Val324, Met220, Tyr334, Thr279            |
|                    | C11                | AKT1                           | -7.9                                           | Lys179, Glu198, Gly294                            |
| EGFR kinase        |                    | -7.9                           | Met793                                         | Leu844, Ala743, Val726, Lys745                    |
| ERK1               |                    | -7.0                           | Met125                                         | Leu173, Ile48, Val56, Asp184                      |
| ERK2               |                    | -7.5                           | Ser151, Asp109                                 | Leu154, Ala50, Ile29, Ile82, Val37, Lys52, Cys164 |
| HSP90 $\alpha$     |                    | -7.9                           | Ser52                                          | Leu107, Val150, Val186, Phe138, Met98             |
| Integrin $\beta$ 1 |                    | -5.7                           | Leu331                                         | Glu390, Arg393, Ile363, Pro333                    |
| JNK1               |                    | -6.9                           | Ser155, Lys153, Ser34                          | Leu168, Val40, Met108, Ile32                      |

| Potent compounds   | Core targets       | Free binding energy (kcal/mol) | Interacted residues                       |                                      |
|--------------------|--------------------|--------------------------------|-------------------------------------------|--------------------------------------|
|                    |                    |                                | Hydrogen bond                             | Other interactions                   |
|                    | MAPK14             | -7.0                           | Arg149                                    | Met78, Leu74, Ile141, Ile146, His148 |
|                    | NF- $\kappa$ B p65 | -6.1                           | Asn115, Gln114                            | Ala102, Val72, Phe113                |
|                    | NO synthase        | -8.4                           | Arg388, Arg266, Tyr347, Gln263            | Glu377, Asp382, Val352, Arg381       |
|                    | PI3K $\alpha$      | -7.8                           | Gly837                                    | Phe666, Leu632, His670, Met811       |
|                    | PPAR $\alpha$      | -7.4                           | Met220, Tyr334, Thr279                    | Val324, Leu321, Met320, Leu331       |
|                    | C12                | AKT1                           | -6.0                                      | Glu191                               |
| EGFR kinase        |                    | -5.7                           | Thr854, Asn842                            | Asp855, Lys745                       |
| ERK1               |                    | -6.1                           | Tyr53, Gly54, Ala52, Asp184, Gly51, Arg84 | -                                    |
| ERK2               |                    | -5.1                           | Gln103, Met106                            | -                                    |
| HSP90 $\alpha$     |                    | -5.6                           | Ser52, Leu48, Asn51, Thr184               | -                                    |
| Integrin $\beta$ 1 |                    | -5.1                           | Lys334, Ser335, Glu361, Ser357            | Lys329                               |
| JNK1               |                    | -4.9                           | Ser155, Arg69, Ser34                      | -                                    |
| MAPK14             |                    | -6.1                           | Asp168, Glu71                             | -                                    |
| NF- $\kappa$ B p65 |                    | -5.2                           | Cys105, Tyr100, Gln114, Ser112            | Gln114                               |
| NO synthase        |                    | -6.4                           | Tyr347, Glu377, Tyr373                    | -                                    |
| PI3K $\alpha$      |                    | -6.2                           | Asn822, Glu172, Arg274, Ser275            | -                                    |
| PPAR $\alpha$      |                    | -5.9                           | Thr283, Asn219                            | Thr279                               |
| C13                | AKT1               | -6.8                           | Glu191, Thr195, Asp292                    | Lys179                               |

| Potent compounds   | Core targets       | Free binding energy (kcal/mol) | Interacted residues            |                                        |                |
|--------------------|--------------------|--------------------------------|--------------------------------|----------------------------------------|----------------|
|                    |                    |                                | Hydrogen bond                  | Other interactions                     |                |
|                    | EGFR kinase        | -6.5                           | Lys745                         | Val726, Ala743, Leu718, Leu844         |                |
|                    | ERK1               | -6.6                           | Asp123, Gln122                 | Ile48, Ala69, Val56, Leu173            |                |
|                    | ERK2               | -5.7                           | Asp109                         | Val37, Leu154, Ala50                   |                |
|                    | HSP90 $\alpha$     | -7.9                           | Tyr139, Gly108, Leu103         | Phe138, Trp162, Val150, Met98          |                |
|                    | Integrin $\beta$ 1 | -4.6                           | Ser396, Asn386, Cys395         | Val385                                 |                |
|                    | JNK1               | -6.3                           | Ser155                         | Leu168, Ala53, Ile32, Val158, Met108   |                |
|                    | MAPK14             | -7.1                           | Thr106                         | Ala51, Val38, Lys53, Ile84, Thr106     |                |
|                    | NF- $\kappa$ B p65 | -5.4                           | Tyr100, Arg108, Gln114         | Tyr100                                 |                |
|                    | NO synthase        | -6.9                           | Tyr347, Tyr373, Glu377         | Glu377, Val352                         |                |
|                    | PI3K $\alpha$      | -7.3                           | Arg818                         | Phe666                                 |                |
|                    | PPAR $\alpha$      | -7.0                           | Tyr314, Tyr464, Ser280, Cys276 | Ile354, Met355                         |                |
|                    | C14                | AKT1                           | -5.3                           | Glu191, Thr195                         | His194, Leu295 |
|                    |                    | EGFR kinase                    | -5.7                           | Thr854, Asp855, Phe856, Thr790, Arg776 | -              |
| ERK1               |                    | -4.4                           | Asp128                         | Val56                                  |                |
| ERK2               |                    | -4.2                           | Gln103, Ala50, Lys52, Ile51    | Met106, Leu154, Ala50                  |                |
| HSP90 $\alpha$     |                    | -5.7                           | Asp93, Thr184                  | Trp162, Phe138                         |                |
| Integrin $\beta$ 1 |                    | -3.3                           | Phe262                         | Phe264                                 |                |
| JNK1               |                    | -4.7                           | Gln37, Arg69                   | Ile32, Val158                          |                |
| MAPK14             |                    | -5.7                           | Asp168                         | Leu108, Val30, Val38, Tyr35, Ala51     |                |

| Potent compounds | Core targets       | Free binding energy (kcal/mol) | Interacted residues                    |                                                |
|------------------|--------------------|--------------------------------|----------------------------------------|------------------------------------------------|
|                  |                    |                                | Hydrogen bond                          | Other interactions                             |
|                  | NF- $\kappa$ B p65 | -4.4                           | Tyr100                                 | Cys105, His111                                 |
|                  | NO synthase        | -5.7                           | Tyr373, Asp382, Tyr347, Gln263, Glu377 | Glu377, Val352                                 |
|                  | PI3K $\alpha$      | -5.3                           | Gln630                                 | Phe666, Leu839, Leu755                         |
|                  | PPAR $\alpha$      | -5.4                           | Leu331, Gly335                         | Met320, Phe218                                 |
| C15              | AKT1               | -5.7                           | Asp292                                 | Leu156, Val164, Ala177, Tyr229, Met281, Phe438 |
|                  | EGFR kinase        | -5.9                           | Thr854                                 | Asp855, Ala743, Val726, Lys745, Leu844         |
|                  | ERK1               | -6.0                           | -                                      | Val56, Ala69, Leu173, Ile48                    |
|                  | ERK2               | -5.4                           | -                                      | Ala50, Ile29, Leu154, Leu105                   |
|                  | HSP90 $\alpha$     | -7.5                           | Leu103, Trp162                         | Met98, Phe138, Val150, Leu107                  |
|                  | Integrin $\beta$ 1 | -4.6                           | -                                      | Glu365, Glu308, Arg426, Gly367                 |
|                  | JNK1               | -5.9                           | -                                      | Ala53, Met111, Ile32, Val158, Ile86, Leu168    |
|                  | MAPK14             | -7.0                           | Thr106                                 | Phe169, Ala51, Tyr35, Val38                    |
|                  | NF- $\kappa$ B p65 | -5.0                           | Asn115, Gln114                         | Tyr100                                         |
|                  | NO synthase        | -6.6                           | Pro350                                 | Val352                                         |
|                  | PI3K $\alpha$      | -6.3                           | Cys838                                 | Phe666, Leu632, His670                         |
|                  | PPAR $\alpha$      | -6.1                           | -                                      | His440, Leu456, Val444, Tyr464, Phe273         |



| Potent compounds | Core targets       | Free binding energy (kcal/mol) | Interacted residues    |                               |
|------------------|--------------------|--------------------------------|------------------------|-------------------------------|
|                  |                    |                                | Hydrogen bond          | Other interactions            |
| C16              | AKT1               | -5.5                           | Gly294                 | Phe161, Leu181                |
|                  | EGFR kinase        | -5.7                           | Asp855, Thr854         | Lys745, Ala743, Val726        |
|                  | ERK1               | -5.7                           | Tyr53, Gly54, Ala52    | Tyr53, Lys71, Ile73           |
|                  | ERK2               | -5.0                           | Met106                 | Ala50, Val37                  |
|                  | HSP90 $\alpha$     | -5.6                           | Tyr139                 | Met98, Val150, Trp162, Phe138 |
|                  | Integrin $\beta$ 1 | -3.9                           | Arg426                 | Arg426, Lys424                |
|                  | JNK1               | -5.3                           | Met111                 | Ala53, Leu168, Val40          |
|                  | MAPK14             | -6.1                           | His148                 | Val83, Ile141, Met78          |
|                  | NF- $\kappa$ B p65 | -4.9                           | His111, Arg108, Tyr100 | -                             |
|                  | NO synthase        | -5.8                           | Ala351                 | Val352, Glu377                |
|                  | PI3K $\alpha$      | -5.7                           | Arg818, Cys838         | Phe666                        |
| PPAR $\alpha$    | -6.0               | Thr283, Asn219                 | Leu321, Val324         |                               |

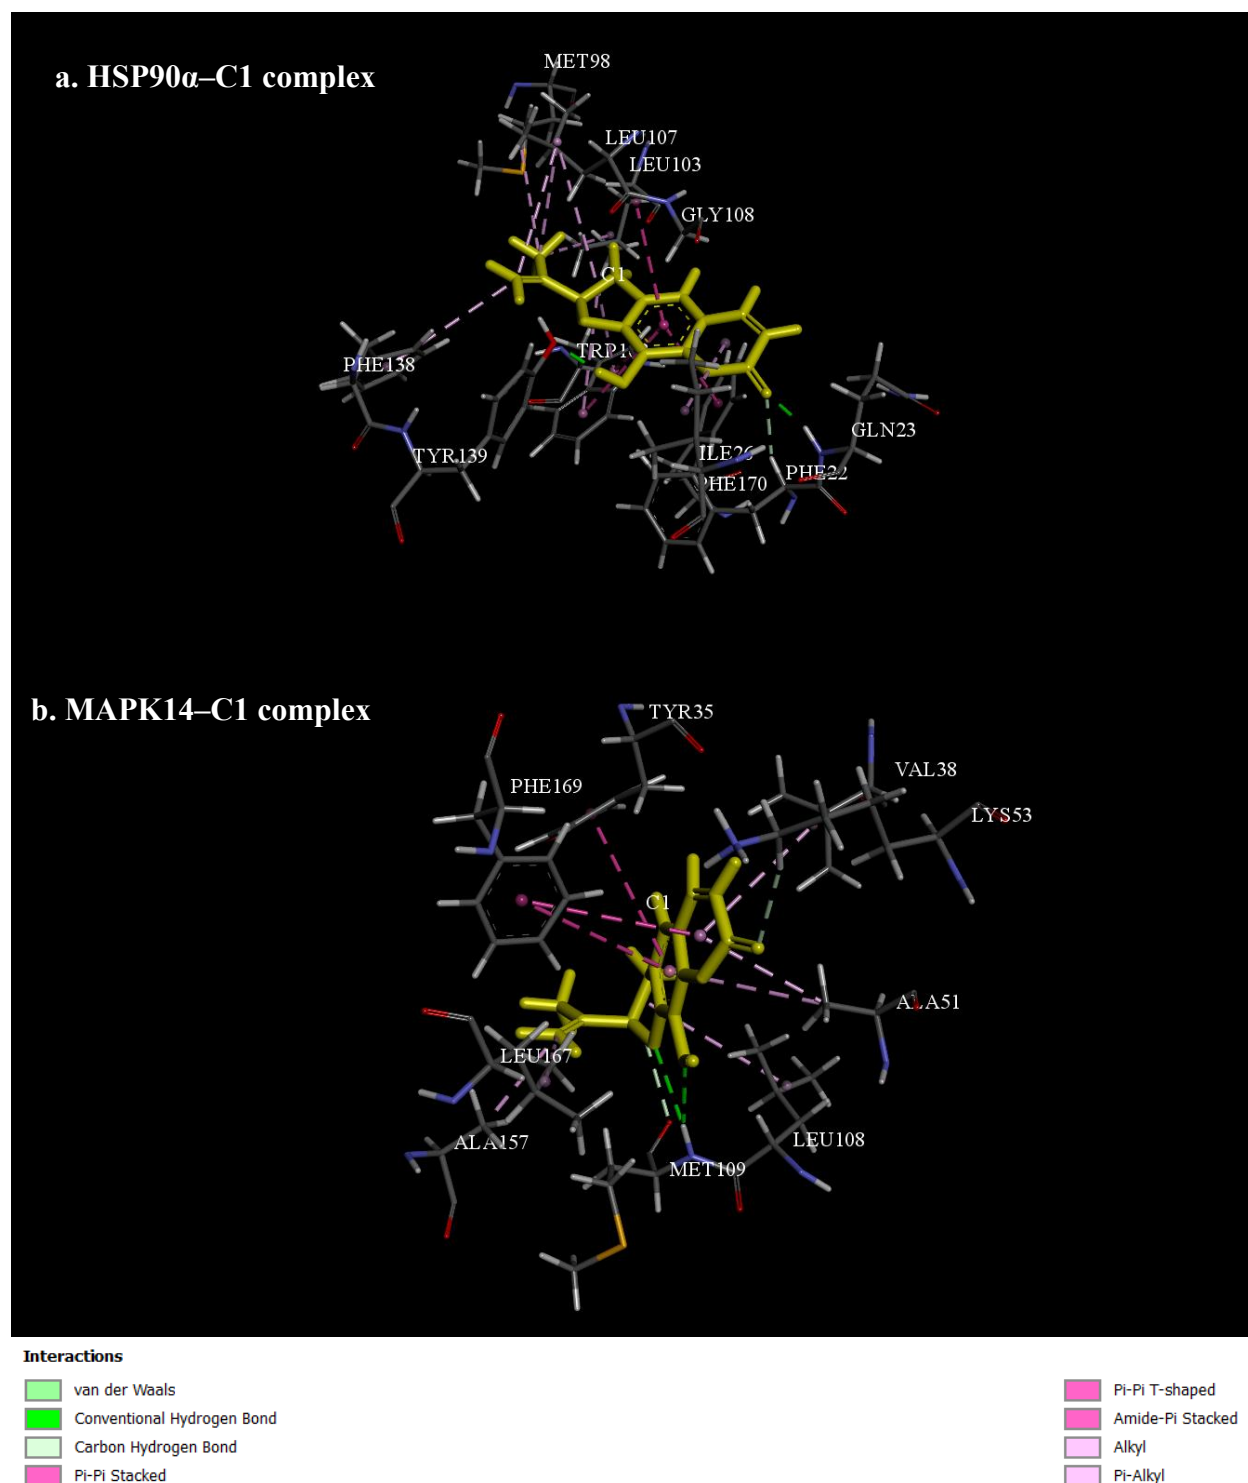

**Figure S1.** Interaction between C1 and HSP90 $\alpha$  (a), MAPK14-C1 (b) after molecular dynamics simulations. The interacted residues of HSP90 $\alpha$  were identified as Phe22, Gln23, Ile26, Met98, Leu103, Leu107, Gly108, Phe138, Tyr139, Trp162, and Phe170. The interacted residues of MAPK14 were identified as Tyr35, Val38, Ala51, Lys53, Leu108, Met109, Ala157, Leu167, and Phe169.
